# Supplementary material
Source: Springer Nature journal article supplement (https://www.springermedizin.de/resource/supplementary/12916_2013_909_MOESM3_ESM.pdf/9598808)
Supplement: MOESM3 [file 9598808]

### **Additional File 3: Description of criteria for groupings in the MDS classification system**

The ICD-10 has over 16,000 codes available, and its replacement, ICD-11 will have a comparable number. These long lists are not suitable for verbal autopsy, where causes of death cannot be ascertained in this great of detail. Using an expert panel, we focused on combining the main-level 3-digit ICD codes into 85 broader categories using the following guidelines: those presenting overlapping signs and symptoms (i.e., meningitis and encephalitis, and prematurity and low birth weight); shared programmatic implications for disease management (i.e., vaccine preventable diseases); those where a common organ, physiological system or pathological process was involved (i.e., cardiovascular disease, cancer by site or point of origin), including non-specific R codes pertaining to an organ system; those commonly found in particular gender and age groups (i.e., maternal and perinatal causes); and finally, ill-defined diseases where a specific organ system could not be identified, or cases of senility and unclassified death. These 85 categories were further grouped into 18 of the major conditions, plus ill-defined deaths. Additional Table 2 shows the detailed ICD-10 codes used in the MDS classification system.

## MDS adult cause of death classification (ages 15+ years)

| Codex4    | Codex2 | Codex | Disease                                                             | ICD 10 range                                                                                                                                                                                                                                                                                           |
|-----------|--------|-------|---------------------------------------------------------------------|--------------------------------------------------------------------------------------------------------------------------------------------------------------------------------------------------------------------------------------------------------------------------------------------------------|
|           |        |       |                                                                     | <b>A00-A99,B00-B17,B19-B99,C46,D50-D53,D64,D84,E00-E02,E40-E64,F53,G00-G09,H10,H60,H65-H68,H70-H71,I30,I32-I33,I39-I41,J00-J22,J32,J36,J65,J85-J86,K02,K04-K05,K61,K65,K67,K81,L00-L04,L08,M00-M01,M60,M86,N10,N30,N34,N41,N49,N61,N70-N74,O00-O99,P00-P96,R04,R50,R75,R95-R96,U00,U04,X53-X54,Y95</b> |
|           |        |       | <b>Communicable, maternal, perinatal and nutritional conditions</b> |                                                                                                                                                                                                                                                                                                        |
| <b>1</b>  |        |       |                                                                     |                                                                                                                                                                                                                                                                                                        |
| <b>1A</b> |        |       | <b>Tuberculosis</b>                                                 | <b>A15-A19, J65, B90</b>                                                                                                                                                                                                                                                                               |
|           | 1A01   |       | Tuberculosis                                                        | A15-A19, B90,J65                                                                                                                                                                                                                                                                                       |
| <b>1B</b> |        |       | <b>HIV/AIDS</b>                                                     | <b>B20-B24,C46,D84 R75</b>                                                                                                                                                                                                                                                                             |
|           | 1B01   |       | HIV/AIDS                                                            | B20-B24,C46,D84 R75                                                                                                                                                                                                                                                                                    |
| <b>1C</b> |        |       | <b>Sexually-transmitted infections excl. HIV/AIDS</b>               | <b>A51-A64, N70-N74</b>                                                                                                                                                                                                                                                                                |
|           | 1C01   |       | Syphilis                                                            | A51-A53                                                                                                                                                                                                                                                                                                |
|           | 1C02   |       | Other sexually transmitted infections (excl. HIV/AIDS)              | A54-A64, N70-N74                                                                                                                                                                                                                                                                                       |
| <b>1D</b> |        |       | <b>Diarrhoeal diseases</b>                                          | <b>A00-A09</b>                                                                                                                                                                                                                                                                                         |
|           | 1D01   |       | Diarrhoeal diseases                                                 | A00-A09                                                                                                                                                                                                                                                                                                |
| <b>1E</b> |        |       | <b>Selected vaccine preventable diseases</b>                        | <b>A33,A35-A37,A80,B01,B03,B05-B06,B26,B91</b>                                                                                                                                                                                                                                                         |
|           | 1E01   |       | Tetanus                                                             | A33,A35                                                                                                                                                                                                                                                                                                |
|           | 1E02   |       | Measles                                                             | B01,B05                                                                                                                                                                                                                                                                                                |
|           | 1E03   |       | Poliomyelitis                                                       | A80, B91                                                                                                                                                                                                                                                                                               |
|           | 1E04   |       | Other vaccine preventable diseases                                  | A36-A37,B03,B06,B26                                                                                                                                                                                                                                                                                    |
| <b>1F</b> |        |       | <b>Meningitis/encephalitis</b>                                      | <b>A39,A81-A89,G00-G09</b>                                                                                                                                                                                                                                                                             |
|           | 1F01   |       | Meningitis/encephalitis                                             | A39, A81,A83-A89, G00-G09                                                                                                                                                                                                                                                                              |
|           | 1F02   |       | Rabies                                                              | A82                                                                                                                                                                                                                                                                                                    |
| <b>1G</b> |        |       | <b>Hepatitis</b>                                                    | <b>B15-B17, B19</b>                                                                                                                                                                                                                                                                                    |
|           | 1G01   |       | Hepatitis                                                           | B15-B17,B19                                                                                                                                                                                                                                                                                            |
| <b>1H</b> |        |       | <b>Malaria</b>                                                      | <b>B50-B54</b>                                                                                                                                                                                                                                                                                         |
|           | 1H01   |       | Malaria                                                             | B50-B54                                                                                                                                                                                                                                                                                                |
| <b>1I</b> |        |       | <b>Selected tropical diseases</b>                                   | <b>A30, A71,A90-A99,B55-B58, B60-B83,B92</b>                                                                                                                                                                                                                                                           |
|           | 1I01   |       | Protozoal diseases                                                  | B55-B58, B60-B64                                                                                                                                                                                                                                                                                       |
|           | 1I02   |       | Leprosy                                                             | A30, B92                                                                                                                                                                                                                                                                                               |
|           | 1I03   |       | Arthropod-borne viral fevers                                        | A90-A99                                                                                                                                                                                                                                                                                                |
|           | 1I04   |       | Trachoma                                                            | A71                                                                                                                                                                                                                                                                                                    |
|           | 1I05   |       | Helminthiasis                                                       | B65-B83                                                                                                                                                                                                                                                                                                |
| <b>1J</b> |        |       | <b>Respiratory infections</b>                                       | <b>H65-H68,H70-H71,J00-J22,J32,J36,J85-J86,P23,U04</b>                                                                                                                                                                                                                                                 |
|           | 1J01   |       | Acute respiratory infections                                        | H65-H68,H70-H71,J00-J22,J32,J36,J85-J86,P23,U04                                                                                                                                                                                                                                                        |
| <b>1K</b> |        |       | <b>Acute bacterial sepsis &amp; severe Infections</b>               | <b>A20-A28,A32,A38,A40-A49,A68,A70,A74-A79,B95-B96,H10,H60,I30,I32-I33,I39-I41,K02,K04-K05,K61,K65,K67,K81,L00-L04,L08,M00-M01,M60,M86,N10,N30,N34,N41,N49,N61,P36-P39</b>                                                                                                                             |
|           | 1K01   |       | Severe Systemic Infection                                           | A20-A28,A32,A38,A40-A49,A68,A70,A74-A79,B95-B96,P36-P39,U80-U89                                                                                                                                                                                                                                        |
|           | 1K02   |       | Severe Localized Infection                                          | H10,H60,I30,I32-I33,I39-I41,K02,K04-K05,K61,K65,K67,K81,L00-L04,L08,M00-M01,M60,M86,N10,N30,N34,N41,N49,N61                                                                                                                                                                                            |
| <b>1L</b> |        |       | <b>Other infectious and parasitic diseases</b>                      | <b>A31,A50,A65-A67,A69,B00, B02,B04,B07-B09,B25,B27-B49,B59,B85-B89,B94,B97-B99,P35,U00,Y95</b>                                                                                                                                                                                                        |
|           | 1L01   |       | Other infectious diseases                                           | A31,A50,A65-A67,A69,B00,B02,B04,B07-B09,B25,B27-B49,B59,B85-B89,B94,B97-B99,P35,U00,Y95                                                                                                                                                                                                                |
| <b>1M</b> |        |       | <b>Maternal conditions</b>                                          | <b>A34,O00-O99,A34,F53</b>                                                                                                                                                                                                                                                                             |
|           | 1M01   |       | Abortion or miscarriage                                             | O00-O08                                                                                                                                                                                                                                                                                                |
|           | 1M02   |       | Hypertensive disorders of pregnancy                                 | O11-O16                                                                                                                                                                                                                                                                                                |
|           | 1M03   |       | Obstetric haemorrhage                                               | O20,O43-O46,O67,O71-O72                                                                                                                                                                                                                                                                                |
|           | 1M04   |       | Maternal sepsis                                                     | O23,O41,O85-O86,O91,A34                                                                                                                                                                                                                                                                                |
|           | 1M05   |       | Other maternal conditions                                           | O10, O21-O22,O24-O40,O42,O47-O66,O68-O70,O73-O84,O87-O90,O92-O99,F53                                                                                                                                                                                                                                   |
| <b>1N</b> |        |       | <b>Perinatal conditions</b>                                         | <b>P00-P22, P24-P29,P50-P96,R95,R96**</b>                                                                                                                                                                                                                                                              |
|           | 1N01   |       | Low birth weight/preterm                                            | P01,P05-P07,P22,P25-P28,P52,P61,P77                                                                                                                                                                                                                                                                    |
|           | 1N02   |       | Birth asphyxia and birth trauma                                     | P02-P03, P10-P15, P20-P21,P24,P50,P90-P91                                                                                                                                                                                                                                                              |
|           | 1N03   |       | Other perinatal conditions                                          | P00, P04, P08,P29, P51,P53-P60,P70-P76,P78-P83,P92-P94, P96,R95,R96** (** includes sudden infant death : R96 < 1 year)                                                                                                                                                                                 |
| <b>1O</b> |        |       | <b>Nutritional deficiencies</b>                                     | <b>D50-D53,D64,E00-E02, E40-E46,E50-E64,X53-X54</b>                                                                                                                                                                                                                                                    |
|           | 1O01   |       | Protein-energy malnutrition                                         | E40-E46,X53-X54                                                                                                                                                                                                                                                                                        |
|           | 1O02   |       | Iron, vitamin deficiencies and nutritional anaemias                 | D50-D53,D64,E00-E02,E50-E64                                                                                                                                                                                                                                                                            |
| <b>1P</b> |        |       | <b>Fever of unknown origin</b>                                      | <b>R50</b>                                                                                                                                                                                                                                                                                             |
|           | 1P01   |       | Fever of unknown origin                                             | R50                                                                                                                                                                                                                                                                                                    |

B18,C00-C45,C47-C97,D00-D48,D55-D63,D65-D83,D86-D89,E03-E35,E65-E90,F00-F52,F54-F99,G10-G99,H00-H06,H11-H59,H61-H62,H69,H72-H95,I00-I28,I31,I34-I38,I42-I99,J30-J31,J33-J35,J37-J64,J66-J84,J90-J99,K00-K01,K03,K06-K60,K62-K63,K66,K70-K80,K82-K93,L05,L10-L99,M02-M54,M61-M85,M87-M99,N00-N08,N11-N29,N31-N33,N35-N40,N42-N48,N50-N60,N62-N64,N75-N99,Q00-Q99,R00-R01,R03,R05-R06,R10-R23,R26-R49,R55-R56,R59,R63,R70-R74,R76-R77,R80-R82,R84-R87,R90-R91,R96\*\*,X45,Y15,Y90-Y91

**2 Noncommunicable diseases**

|           |                                                            |                                                                                                            |
|-----------|------------------------------------------------------------|------------------------------------------------------------------------------------------------------------|
| <b>2A</b> | <b>Neoplasms</b>                                           | <b>C00-C45,C47-C97,D00-D48,N60,N62-N64,N87,R59</b>                                                         |
| 2A01      | Upper aerodigestive                                        | C00-C15,C30-C32,D10-D11                                                                                    |
| 2A02      | Stomach                                                    | C16                                                                                                        |
| 2A03      | Colon, rectum and small intestine                          | C17-C21,D12                                                                                                |
| 2A04      | Liver                                                      | C22                                                                                                        |
| 2A05      | Other digestive                                            | C23-C26,C48,D00-D01,D13,D37                                                                                |
| 2A06      | Lung & airway cancers                                      | C33-C34,C39,D02,D14                                                                                        |
| 2A07      | Breast cancer                                              | C50,D05,D24,N60, N62-N64                                                                                   |
| 2A08      | Cervix & Uterus cancers                                    | C53-C55,D06,N87                                                                                            |
| 2A09      | Other female genital cancer                                | C51-C52,C56-C58,D25-D28,D39                                                                                |
| 2A10      | Male genital cancers                                       | C60-C63,D29,D40                                                                                            |
| 2A11      | Urinary                                                    | C64-C68, D30,D41                                                                                           |
| 2A12      | Brain and eye                                              | C69-C72,D31-D33,D42-D43                                                                                    |
| 2A13      | Leukemias, lymphomas and oth. hemotopoitic malignancie     | C81-C96,D45-D47                                                                                            |
| 2A14      | Other neoplasms                                            | C37-C38,C40-45,C47,C49,C73-C75,C77-C79,C97,D03-D04,D07-D09,D15-D23,D34-D36,D38,D44,R59                     |
| 2A15      | Cancer with unspecified sites                              | C76,C80,D48                                                                                                |
| <b>2B</b> | <b>Diabetes mellitus</b>                                   | <b>E10-E14</b>                                                                                             |
| 2B01      | Diabetes mellitus                                          | E10-E14                                                                                                    |
| <b>2C</b> | <b>Endocrine and immune disorders</b>                      | <b>D55-D63,D65-D83,D86-D89,E03-E07,E15-E16,E20-E35,E65-E90,R70-R74,R76-R77,R81</b>                         |
| 2C01      | Endocrine and immune disorders                             | D55-D63, D65-D83, D86-D89, E03-E07, E15-E16, E20-E35, E65-E90,R70-R74,R76-R77,R81                          |
| <b>2D</b> | <b>Neuro-psychiatric conditions</b>                        | <b>F00-F09,F11-F52,F54-F99, G10-G44,G47-G80,G90-G99,R26-R29,R40-R49,R56,R90</b>                            |
| 2D01      | Epilepsy                                                   | G40-G41,R56                                                                                                |
| 2D02      | Other neuropsychiatric disorders                           | F00-F09,F11-F39,F40-F52,F54-F99,G10-G37,G43-G44,G47-G73, G80,G90-G99,R26-R29,R40-R49,R90                   |
| <b>2F</b> | <b>Skin, Musculoskeletal, Senses Organ, Oral disorders</b> | <b>H00-H06,H11-H59,H61-H62,H69,H72-H95,K00-K01,K03,K06-K14,L05,L10-L99,M02-M54,M61-M85,M87-M99,R20-R23</b> |
| 2F01      | Skin diseases                                              | L05,L10-L99,R20-R23                                                                                        |
| 2F02      | Musculoskeletal disorders                                  | M02-M54,M61-M85,M87-M99                                                                                    |
| 2F03      | Sense organ disorders                                      | H00-H06,H11-H59,H61-H62,H69,H72-H95                                                                        |
| 2F04      | Oral conditions                                            | K00-K01,K03,K06-K14                                                                                        |
| <b>2G</b> | <b>Cardiovascular diseases</b>                             | <b>G45-G46,G81-G83,I00-I28,I31,I34-I84,I86-I99,R00-R01,R03,R55,R96**</b>                                   |
| 2G01      | Rheumatic heart disease                                    | I00-I09,I38                                                                                                |
| 2G02      | Hypertensive heart diseases                                | I10-I15                                                                                                    |
| 2G03      | Ischaemic heart diseases                                   | I20-I25,I44,I46,I70,R55,R96**                                                                              |
| 2G04      | Cerebrovascular disease                                    | I60-I69,G45-G46,G81-G83                                                                                    |
| 2G05      | Heart failure                                              | I50                                                                                                        |
| 2G06      | Other cardiovascular diseases                              | I26-I28,I31,I34-I37,I42-I43,I45,I47-I49,I51-I52,I71-I84,I86-I99,R00-R01,R03                                |
| <b>2H</b> | <b>Chronic Respiratory diseases</b>                        | <b>J30-J31,J33-J35,J37-J64,J66-J84,J90-J99,R04-R06,R84,R91</b>                                             |
| 2H01      | Asthma and Chronic obstructive pulmonary disease           | J40-J47,J63,J93                                                                                            |
| 2H02      | Other chronic respiratory diseases                         | J30-J31,J33-J35,J37-J39,J60-J62,J64,J66-J84,J90-J92,J94-J99,R04-R06,R84,R91                                |
| <b>2J</b> | <b>Digestive diseases</b>                                  | <b>B18,F10,I85,K20-K60,K62-K63,K66,K70-K80,K82-K93,R10-R19,R63,R85,X45,Y15,Y90,Y91</b>                     |
| 2J01      | Gastro-oesophageal                                         | K20-K23,K25-K31,I85,R12,R13                                                                                |
| 2J02      | Lliver and alcohol related diseases                        | B18,F10,K70-K77,R16-R18,X45,Y15,Y90-Y91                                                                    |
| 2J03      | Other digestive diseases                                   | K35-K38, K40-K60,K62-K63,K66,K80,K82-K93,R10-R11,R14-R15,R19,R63,R85                                       |
| <b>2K</b> | <b>Genito-urinary diseases</b>                             | <b>N00-N08,N11-N29,N31-N33,N35-N40,N42-N48,N50-N51,N75-N86,N88-N99,R30-R39,R80,R82,R86,R87</b>             |
| 2K01      | Nephritis and nephrosis                                    | N00-N08,N11-N19                                                                                            |
| 2K02      | Other genitourinary system diseases                        | N20-N29,N31-N33,N35-N40,N42-N48,N50-N51, N75-N86,N88-N99,R30-R39,R80,R82,R86,R87                           |
| <b>2L</b> | <b>Congenital anomalies</b>                                | <b>Q00-Q99</b>                                                                                             |
| 2L01      | Congenital anomalies                                       | Q00-Q99                                                                                                    |

|           |                                                                                             |                                                                                              |
|-----------|---------------------------------------------------------------------------------------------|----------------------------------------------------------------------------------------------|
| <b>3</b>  | <b>Injuries</b>                                                                             | <b>V01-V99,W00-W99,X00-X44,X46-X52,X57-Y14,Y16-Y36,Y40-Y89,Y96-Y98</b>                       |
| <b>3A</b> | <b>Unintentional injuries</b>                                                               | <b>V01-V99,W00-W99,X00-X44,X46-X52, X57-X59,Y40-Y86,Y88-Y89</b>                              |
| 3A01      | Road traffic accidents                                                                      | V01-V04,V06-V80, V82--V83,V86-V89,V99,Y85                                                    |
| 3A02      | Other transport accidents                                                                   | V05,V81,V84-V85,V90-V98                                                                      |
| 3A03      | Poisonings                                                                                  | X40-X44,X46-X49                                                                              |
| 3A04      | Falls                                                                                       | W00-W19                                                                                      |
| 3A05      | Fires                                                                                       | X00-X09                                                                                      |
| 3A06      | Drownings                                                                                   | W65-W74                                                                                      |
| 3A07      | Venomous snakes, animals and plants                                                         | X20-X29,W57,W60                                                                              |
| 3A08      | Other unintentional injuries                                                                | W20-W56,W58-W59,W64,W75-W99, X10-X19,X30-X39,X50-X52,X57-X59,Y40-Y84,Y86,Y88-Y89             |
| <b>3B</b> | <b>Intentional injuries</b>                                                                 | <b>X60-Y09,Y35-Y36,Y87</b>                                                                   |
| 3B01      | Self-inflicted injuries (suicide)                                                           | X60-X84                                                                                      |
| 3B02      | Interpersonal violence and other intentional injuries                                       | X85-Y09,Y35-Y36,Y87                                                                          |
| <b>3C</b> | <b>Undetermined Intent</b>                                                                  | <b>Y10-Y14,Y16-Y34,Y96-Y98</b>                                                               |
| 3C01      | Undetermined Intent                                                                         | Y10-Y14,Y16-Y34,Y96-Y98                                                                      |
| <b>3D</b> | <b>Injury and poisoning -* MDS not implemented this catagory</b>                            | <b>Injury and poisoning -* MDS instruction given Not to code this catagory</b>               |
| 3D01      | Injury and poisoning -* MDS instruction given                                               | S00-T98                                                                                      |
| <b>4</b>  | <b>Symptoms, signs and Ill-defined conditions</b>                                           | <b>B18,F10,I85,K20-K60,K62-K63,K66,K70-K80,K82-K93,R11-R19,R63,R85,X45,Y15,Y90,Y91</b>       |
| <b>4A</b> | <b>Ill defined or cause unknown</b>                                                         | <b>R02,R07-R09,R25,R51-R54,R57-R58,R60-R62,R64-R69,R78-R79,R83,R89,R92-R94,R96**,R98-R99</b> |
| 4A01      | Senility                                                                                    | R54                                                                                          |
| 4A02      | Other Ill-defined and abnormal findings                                                     | R02,R07-R09,R25,R51-R53,R57,R58,R60-R62,R64-R69,R78-R79,R83,R89,R92-R94,R96**,R98            |
| 4A03      | Unspecified deaths                                                                          | R99                                                                                          |
| <b>5</b>  | <b>Factors influencing health status and contact with health services</b>                   | <b>Z00-Z99</b>                                                                               |
| <b>5A</b> | <b>Factors influencing health status and contact with health services (not used in MDS)</b> | <b>Z00-Z99</b>                                                                               |
| 5A01      | Factors influencing health status                                                           | Z00-Z99                                                                                      |

---

## MDS child cause of death classification (ages 1-59 months)

| CCodex4   | CCodex2 | CCodex | Disease                                                   | ICD 10 range                                                                                                                                                                                                                                                                                                                                                                                                                                                                                                                                                            |
|-----------|---------|--------|-----------------------------------------------------------|-------------------------------------------------------------------------------------------------------------------------------------------------------------------------------------------------------------------------------------------------------------------------------------------------------------------------------------------------------------------------------------------------------------------------------------------------------------------------------------------------------------------------------------------------------------------------|
| <b>1</b>  |         |        | <b>Communicable, perinatal and nutritional conditions</b> |                                                                                                                                                                                                                                                                                                                                                                                                                                                                                                                                                                         |
|           |         |        | <b>Early childhood infections</b>                         | <b>A20-A28,A32,A37-A44,A46,A48-A49,A68-A70,A74-A75,A77-A79,A81-A89,B95-B96,G00-G09,H10,H60,H65-H68,H70-H71,I30,I32-I33,I39-I41,J00-J22,J32,J36,J85-J86,K65,K67,K81,L00-L04,L08,M00-M01,M60,M86,N10,N30,N34,N41,N49,N61,P23,P36,P38,U04</b>                                                                                                                                                                                                                                                                                                                              |
| <b>1A</b> |         |        |                                                           |                                                                                                                                                                                                                                                                                                                                                                                                                                                                                                                                                                         |
|           | 1A01    |        | Pneumonia                                                 | A37, H65-H68, H70-H71, J00-J22, J32, J36, J85-J86, P23, U04                                                                                                                                                                                                                                                                                                                                                                                                                                                                                                             |
|           | 1A02    |        | Acute bacterial sepsis and severe infections              | A20-A28, A32, A38, A40-A44, A46, A48-A49, A68-A70, A74-A75, A77-A79, B95-B96, H10, H60, I30, I32-I33, I39-I41, K65, K67, K81, L00-L04, L08, M00-M01, M60, M86, N10, N30, N34, N41, N49, N61, P36, P38                                                                                                                                                                                                                                                                                                                                                                   |
|           | 1A03    |        | Meningitis/encephalitis                                   | A39, A81-A89, G00-G09                                                                                                                                                                                                                                                                                                                                                                                                                                                                                                                                                   |
|           |         |        | <b>Other communicable diseases</b>                        | <b>A00-A09,A15-A19, A30-A31,A33-A36, A50-A67, A71,A80,A90-A99, B90, J65, B91,B01, B05,B20-B24, R75,B50-B54, B00, B02-B04, B06-B09, B15-B19, B25-B27, B30, B33-B49, B55--B60, B64-B83,B85-B89, B92, B94, B97, B99, K02, K04, K05, K61, N70-N74, P35, P37, P39, U00, Y95R50</b>                                                                                                                                                                                                                                                                                           |
| <b>1B</b> |         |        |                                                           |                                                                                                                                                                                                                                                                                                                                                                                                                                                                                                                                                                         |
|           | 1B01    |        | Diarrhoeal diseases                                       | A00-A09                                                                                                                                                                                                                                                                                                                                                                                                                                                                                                                                                                 |
|           | 1B02    |        | Tuberculosis                                              | A15-A19, B90, J65                                                                                                                                                                                                                                                                                                                                                                                                                                                                                                                                                       |
|           | 1B03    |        | Tetanus                                                   | A33-A35                                                                                                                                                                                                                                                                                                                                                                                                                                                                                                                                                                 |
|           | 1B04    |        | Poliomyelitis                                             | A80, B91                                                                                                                                                                                                                                                                                                                                                                                                                                                                                                                                                                |
|           | 1B05    |        | Measles                                                   | B01, B05                                                                                                                                                                                                                                                                                                                                                                                                                                                                                                                                                                |
|           | 1B06    |        | HIV/AIDS                                                  | B20-B24, R75                                                                                                                                                                                                                                                                                                                                                                                                                                                                                                                                                            |
|           | 1B07    |        | Malaria                                                   | B50-B54                                                                                                                                                                                                                                                                                                                                                                                                                                                                                                                                                                 |
|           | 1B08    |        | Other infectious and parasitic diseases                   | A30-A31, A36, A50-A67, A71, A90-A99, B00, B02-B04, B06-B09, B15-B19, B25-B27, B30, B33-B49, B55--B60, B64-B83,B85-B89, B92, B94, B97, B99, K02, K04, K05, K61, N70-N74, P35, P37, P39, U00, Y95                                                                                                                                                                                                                                                                                                                                                                         |
|           | 1B09    |        | Fever of unknown origin                                   | R50                                                                                                                                                                                                                                                                                                                                                                                                                                                                                                                                                                     |
| <b>1C</b> |         |        | <b>Perinatal conditions</b>                               | <b>P00-P03,P05,P07,P10-P15,P20-P22,P24-P29,P50,P52,P61,P77,P90-P91</b>                                                                                                                                                                                                                                                                                                                                                                                                                                                                                                  |
|           | 1C01    |        | Prematurity & low birthweight                             | P01, P05, P07, P22, P25-P28, P52, P61, P77                                                                                                                                                                                                                                                                                                                                                                                                                                                                                                                              |
|           | 1C02    |        | Birth asphyxia & birth trauma                             | P00, P02-P03, P10-P15, P20-P21, P24, P29, P50, P90-P91                                                                                                                                                                                                                                                                                                                                                                                                                                                                                                                  |
| <b>1D</b> |         |        | <b>Other conditions</b>                                   | <b>D50-D53,E00-E02,E40-E46,E50-E56,E59-E61,E63-E64,Q00-Q07,Q10-18,Q20-Q28,Q30-Q45,Q50-56,Q60-Q87,Q89-Q93,Q95-Q99,X53-X54</b>                                                                                                                                                                                                                                                                                                                                                                                                                                            |
|           | 1D01    |        | Nutritional diseases                                      | D50-D53, E00-E02, E40-E46, E50-E56, E59-E61, E63-E64, X53-X54                                                                                                                                                                                                                                                                                                                                                                                                                                                                                                           |
|           | 1D02    |        | Congenital anomalies                                      | Q00-Q07, Q10-18, Q20-Q28, Q30-Q45, Q50-56, Q60-Q87, Q89-Q93, Q95-Q99                                                                                                                                                                                                                                                                                                                                                                                                                                                                                                    |
| <b>2</b>  |         |        | <b>NonCommunicable diseases</b>                           |                                                                                                                                                                                                                                                                                                                                                                                                                                                                                                                                                                         |
|           |         |        | <b>Noncommunicable diseases</b>                           | <b>C00-C97,D00-D48,D55-D89,E03-E35,E65-E90,F00-F99,G10-G99,H00-H06,H11-H59,H61-H62,H69,H72-H95,I00-I28,I31,I34-I38,I42-I99,J30-J31,J33-J35,J37-J47,J60,J64,J66-J70,J80-J82,J84,J90-J99,K00-K01,K03,K06-K60,K62-K63,K70-K80,K82-K93,L05,L10-L99,M02-M54,M61-M85,M87-M99,N00-N08,N11-N29,N31-N33,N35-N40,N42-N48,N50-N51,N60,N62-N64,N75-N99,P04,P08,P51,P53-P60,P70-P72,P74-P76,P78,P80-P83,P92-P94,R00-R01,R03-R05,R06,R10-R23,R26,R27,R29-R49,R55-R56,R59,R63,R70-R74,R76-R77,R80-R82,R84-R87,R90-R91</b>                                                              |
| <b>2A</b> |         |        |                                                           |                                                                                                                                                                                                                                                                                                                                                                                                                                                                                                                                                                         |
|           | 2A01    |        | Noncommunicable diseases                                  | C00-C97, D00-D48, D55-D89, E03-E35, E65-E90, F00-F99, G10-G99, H00-H06, H11-H59, H61-H62, H69, H72-H95, I00-I28, I31, I34-I38, I42-I99, J30-J31, J33-J35, J37-J47, J60, J64, J66-J70, J80-J82, J84, J90-J99, K00-K01, K03, K06-K60, K62-K63, K70-K80, K82-K93, L05, L10-L99, M02-M54, M61-M85, M87-M99, N00-N08, N11-N29, N31-N33, N35-N40, N42-N48, N50-N51, N60, N62-N64, N75-N99, P04, P08, P51, P53-P60, P70-P72, P74-P76, P78, P80-P83, P92-P94, R00-R01, R03-R05, R06, R10-R23, R26, R27, R29-R49, R55-R56, R59, R63, R70-R74, R76-R77, R80-R82, R84-R87, R90-R91 |
| <b>3</b>  |         |        | <b>Injuries</b>                                           |                                                                                                                                                                                                                                                                                                                                                                                                                                                                                                                                                                         |
| <b>3A</b> |         |        | <b>Injuries</b>                                           | <b>V01-V99, W00-W99, X00-X52, X57-X99, Y00-Y91, Y97-Y98</b>                                                                                                                                                                                                                                                                                                                                                                                                                                                                                                             |
|           | 3A01    |        | Injuries ±                                                | V01-V99, W00-W99, X00-X52, X57-X99, Y00-Y91, Y97-Y98                                                                                                                                                                                                                                                                                                                                                                                                                                                                                                                    |
| <b>4</b>  |         |        | <b>Ill-defined conditions</b>                             |                                                                                                                                                                                                                                                                                                                                                                                                                                                                                                                                                                         |
| <b>4A</b> |         |        | <b>Ill defined or cause unknown</b>                       | <b>P96, R02, R07, R09, R25, R51-R54, R57-R58, R60-R62, R64, R68-R69, R78-R79, R83, R89, R92-R99</b>                                                                                                                                                                                                                                                                                                                                                                                                                                                                     |
|           | 4A01    |        | Ill defined or cause unknown                              | P96, R02, R07, R09, R25, R51-R54, R57-R58, R60-R62, R64, R68-R69, R78-R79, R83, R89, R92-R99                                                                                                                                                                                                                                                                                                                                                                                                                                                                            |

± External causes of injuries exclude S00-S99, T00-T99

## MDS neonatal cause of death classification (ages 0-28 days)

| NCodex4   | NCodex2 | NCodex | Disease                                                   | ICD 10 range                                                                                                                                                                                                                                                                                                                                                                                                                                                                                                                                                           |
|-----------|---------|--------|-----------------------------------------------------------|------------------------------------------------------------------------------------------------------------------------------------------------------------------------------------------------------------------------------------------------------------------------------------------------------------------------------------------------------------------------------------------------------------------------------------------------------------------------------------------------------------------------------------------------------------------------|
| <b>1</b>  |         |        | <b>Communicable, perinatal and nutritional conditions</b> |                                                                                                                                                                                                                                                                                                                                                                                                                                                                                                                                                                        |
|           |         |        | <b>Neonatal_Infections:</b>                               | <b>A20-A28, A32,A37-A44-A49,A68-A70,A74-A79,A81-A89,B95-B96,G00-G09,H10,H60,H65-H68,H70-H71,I30,I32-I33,I39-I41,J00-J22,J32,J36,J85-J86,K65,K67,K81,L00-L04,L08,M00-M01,M60,M86,N10,N30,N34,N41,N49,N61,P23,P35-P39,U04</b>                                                                                                                                                                                                                                                                                                                                            |
| <b>1A</b> |         |        |                                                           |                                                                                                                                                                                                                                                                                                                                                                                                                                                                                                                                                                        |
|           | 1A01    |        | Neonatal Pneumonia                                        | A37, H65-H68, H70, H71, J00-J22, J32, J36, J85, J86, P23, U04                                                                                                                                                                                                                                                                                                                                                                                                                                                                                                          |
|           | 1A02    |        | Sepsis                                                    | A20-A28, A32, A38, A40-A44, A46, A48, A49, A68-A70, A74, A75, A77-A79, B95, B96, H10, H60, I30, I32-I33, I39-I41, K65, K67, K81, L00-L04,L08, M00-M01, M60, M86, N10, N30, N34, N41, N49, N61, P35-P39                                                                                                                                                                                                                                                                                                                                                                 |
|           | 1A03    |        | Meningitis/encephalitis                                   | A39, A81-A89, G00-G09                                                                                                                                                                                                                                                                                                                                                                                                                                                                                                                                                  |
|           |         |        | <b>Other communicable diseases</b>                        | <b>A00-A09,A15-A19,A30-A31,A33-A36,A50-A67,A71,A80,A90-A99,B00-B09,B15-B27,B30,B33-B60,B64-B83,B85-B92,B94,B97,B99,J65,K04-K05,K61,N70-N74,R50,R75,U00,Y95</b>                                                                                                                                                                                                                                                                                                                                                                                                         |
| <b>1B</b> |         |        |                                                           |                                                                                                                                                                                                                                                                                                                                                                                                                                                                                                                                                                        |
|           | 1B01    |        | Diarrhoeal diseases                                       | A00-A09                                                                                                                                                                                                                                                                                                                                                                                                                                                                                                                                                                |
|           | 1B02    |        | Tetanus                                                   | A33-A35                                                                                                                                                                                                                                                                                                                                                                                                                                                                                                                                                                |
|           | 1B03    |        | Poliomyelitis                                             | A80, B91                                                                                                                                                                                                                                                                                                                                                                                                                                                                                                                                                               |
|           | 1B04    |        | Measles                                                   | B01, B05                                                                                                                                                                                                                                                                                                                                                                                                                                                                                                                                                               |
|           | 1B05    |        | Malaria                                                   | B50-B54                                                                                                                                                                                                                                                                                                                                                                                                                                                                                                                                                                |
|           | 1B06    |        | Other infectious and parasitic diseases                   | A15-A19, A30-A31, A36, A50-A67, A71, A90-A99, B00, B02-B04, B06-B09, B15-B27, B30, B33-B49, B55--B60, B64-B83,B85-B90, B92, B94, B97, B99, J65, K04, K05, K61, N70-N74, R75, U00, Y95                                                                                                                                                                                                                                                                                                                                                                                  |
|           | 1B07    |        | Fever of unknown origin                                   | R50                                                                                                                                                                                                                                                                                                                                                                                                                                                                                                                                                                    |
| <b>1C</b> |         |        | <b>Perinatal conditions</b>                               | <b>P00-P03,P05,P07,P10-P15,P20-P22,P24-P29,P50,P52,P61,P77,P90-P91,R04</b>                                                                                                                                                                                                                                                                                                                                                                                                                                                                                             |
|           | 1C01    |        | Prematurity & low birthweight                             | P01, P05, P07, P22, P25-P28, P52, P61, P77, R04                                                                                                                                                                                                                                                                                                                                                                                                                                                                                                                        |
|           | 1C02    |        | Birth asphyxia & birth trauma                             | P00, P02, P03, P10-P15, P20, P21, P24, P29, P50, P90, P91                                                                                                                                                                                                                                                                                                                                                                                                                                                                                                              |
| <b>1D</b> |         |        | <b>Other perinatal conditions</b>                         | <b>D50-D53,E00-E02,E40-E46,E50-E56,E59-E61,E63-E64,G10-G99,Q00-Q99,X53-X54</b>                                                                                                                                                                                                                                                                                                                                                                                                                                                                                         |
|           | 1D01    |        | Congenital anomalies                                      | G10-G99, Q00-Q99                                                                                                                                                                                                                                                                                                                                                                                                                                                                                                                                                       |
|           | 1D02    |        | Nutritional diseases                                      | D50-D53, E00-E02, E40-E46, E50-E56, E59-E61, E63, E64, X53-X54                                                                                                                                                                                                                                                                                                                                                                                                                                                                                                         |
| <b>2</b>  |         |        | <b>NnCommunicable diseases</b>                            |                                                                                                                                                                                                                                                                                                                                                                                                                                                                                                                                                                        |
|           |         |        | <b>Noncommunicable diseases</b>                           | <b>C00-C97,D00-D48,D55-D89,E03-E35,E65-E90,F00-F99,H00-H06,H11-H59,H61-H62,H69,H72-H95,I00-I28,I31,I34-I38,I42-I99,J30-J31,J33-J35,J37-J47,J60,J64,J66-J70,J80-J82,J84,J90-J99,K00-K03,K06-K60,K62-K63,K70-K80,K82-K93,L05,L10-L99,M02-M54,M61-M85,M87-M99,N00-N08,N11-N29,N31-N33,N35-N40,N42-N48,N50-N51,N60,N62-N64,N75-N99,P04,P08,P51,P53-P60,P70-P72,P74-P76,P78,P80-P83,P92-P94,R00-R01,R03,R05-R06,R10-R23,R26-R27,R29-R36,R39-R49,R55-R56,R59,R63,R70-R74,R76-R77,R80-R82,R84-R87,R90-R91</b>                                                                 |
| <b>2A</b> |         |        |                                                           |                                                                                                                                                                                                                                                                                                                                                                                                                                                                                                                                                                        |
|           | 2A01    |        | Noncommunicable diseases                                  | C00-C97, D00-D48, D55-D89, E03-E35, E65-E90, F00-F99, H00-H06, H11-H59, H61-H62, H69, H72-H95, I00-I28, I31, I34-I38, I42-I99, J30, J31, J33-J35, J37-J47, J60, J64, J66-J70, J80-J82, J84, J90-J99, K00-K03, K06-K60, K62-K63, K70-K80, K82-K93, L05, L10-L99, M02-M54, M61-M85, M87-M99, N00-N08, N11-N29, N31-N33, N35-N40, N42-N48, N50-N51, N60, N62-N64, N75-N99, P04, P08, P51, P53-P60, P70-P72, P74-P76, P78, P80-P83, P92-P94, R00, R01, R03, R05, R06, R10-R23,R26, R27, R29-R36, R39-R49, R55, R56, R59, R63, R70-R74, R76-R77, R80-R82, R84-R87, R90, R91 |
| <b>3</b>  |         |        | <b>Injuries</b>                                           |                                                                                                                                                                                                                                                                                                                                                                                                                                                                                                                                                                        |
| <b>3A</b> |         |        | <b>Injuries</b>                                           | <b>S00-S99,T00-T98,V01-V99,W00-W99,X00-X52,X57-X99,Y00-Y91,Y97-Y98</b>                                                                                                                                                                                                                                                                                                                                                                                                                                                                                                 |
|           | 3A01    |        | Injuries                                                  | S00-S99, T00-T98, V01-V99, W00-W99, X00-X52, X57-X99, Y00-Y91, Y97-Y98                                                                                                                                                                                                                                                                                                                                                                                                                                                                                                 |
| <b>4</b>  |         |        | <b>Ill-defined conditions</b>                             |                                                                                                                                                                                                                                                                                                                                                                                                                                                                                                                                                                        |
| <b>4A</b> |         |        | <b>Ill defined or cause unknown</b>                       | <b>P96,R02,R07,R09,R25,R51-R54,R57-R58,R60-R62,R64,R68,R69,R78,R79,R83,R89,R92-R99</b>                                                                                                                                                                                                                                                                                                                                                                                                                                                                                 |
|           | 4A01    |        | Ill defined or cause unknown                              | P96, R02, R07, R09,R25, R51-R54, R57-R58, R60-R62, R64, R68, R69, R78, R79, R83, R89, R92-R99                                                                                                                                                                                                                                                                                                                                                                                                                                                                          |

# GBD cause of death classification

|            | GBD2010_Name                                                                                    | GBD2010_ICD10 Code                                                                                                                                                                                                                                                                                                                                                                                                                                                                                                                                                                                                                                                                                                                                                                                                                                                                                                                                             |
|------------|-------------------------------------------------------------------------------------------------|----------------------------------------------------------------------------------------------------------------------------------------------------------------------------------------------------------------------------------------------------------------------------------------------------------------------------------------------------------------------------------------------------------------------------------------------------------------------------------------------------------------------------------------------------------------------------------------------------------------------------------------------------------------------------------------------------------------------------------------------------------------------------------------------------------------------------------------------------------------------------------------------------------------------------------------------------------------|
|            | <b>Communicable, maternal, neonatal and nutritional disorders</b>                               | <b>A00,A01,A02-A04,A06-A09,A15-A19,A20-A28,A30,A31-A32,A33-A35,A36,A37,A38,A39,A42-A49(exceptA48.0,A48.3,A49.9),A50-A58,A59**,A60**,A63**,A65-A70(exceptA68),A71**,A74(exceptA74.0),A74.0**,A80,A81,A82,A83-A86,A87,A88-A89,A90-A91,A95,A99,B01-B02,B03,B04,B05,B06,B15,B16,B17.0,B17.1,B17.2,B20-B24,B25,B26,B27-B49(exceptB35-B36),B50-B54,B55,B56,B57,B58-64,B65,B66,B67,B69,B73,B74(exceptB74.3,B74.4,B74.8,B74.9),B76,B90,B92,B94.0**,B94.1,C46-C469,D50,D51-D53,D64.9,D84.9,E00-E02,E40-E46,E50,E51-E63.9,E64.0,64.1,E64.2-E64.3,G00.0,G00.1,G00.2-G03.9,G04,H65-H68,H70,J00-J06,J09-J11,J12(exceptJ12.1),J12.1,J13,J14,J15-J22,J85,N70-N73.9,O00-O99,P00,P01.0,P01.1,P01.2-P01.6,P01.7-P01.9,P02-P03,P04,P05,P07,P08.0-P08.2,P10-P15,P20-P21,P22,P23,P24,25-P28,P29,P35.0,P35.1,P35.2,P35.3,P35.8,P35.9,P36,P37.0,P37.2,P37.3,P37.4,P37.5-P37.9,P38-P39,P50-P74(exceptP61.2,P52,P52,P61.2,P70,P70),P76,P77,P78-P83,P90-P91,P92-P94,P96(exceptP96.9)</b> |
| <b>A</b>   | <b>HIV/AIDS and tuberculosis</b>                                                                | <b>A15-A19, B90, P37.0, B20-B24, C46-C469, D84.9</b>                                                                                                                                                                                                                                                                                                                                                                                                                                                                                                                                                                                                                                                                                                                                                                                                                                                                                                           |
| A.1.1      | Tuberculosis                                                                                    | A15-A19, B90, P37.0                                                                                                                                                                                                                                                                                                                                                                                                                                                                                                                                                                                                                                                                                                                                                                                                                                                                                                                                            |
| A.1.2      | HIV/AIDS                                                                                        | B20-B24, C46-C469, D84.9                                                                                                                                                                                                                                                                                                                                                                                                                                                                                                                                                                                                                                                                                                                                                                                                                                                                                                                                       |
| A.1.2.1    | HIV disease resulting in mycobacterial infection                                                | B20.0                                                                                                                                                                                                                                                                                                                                                                                                                                                                                                                                                                                                                                                                                                                                                                                                                                                                                                                                                          |
| A.1.2.2    | HIV disease resulting in other specified or unspecified diseases                                | B20-B24(except B20.0), C46-C469, D84.9                                                                                                                                                                                                                                                                                                                                                                                                                                                                                                                                                                                                                                                                                                                                                                                                                                                                                                                         |
|            | <b>Diarrhea, lower respiratory infections, meningitis, and other common infectious diseases</b> | <b>A00, A02-A04, A06-A09, A01, J09-J11, J13, J14, J12.1, J12 (except J12.1), J15-J22, J85, P23, J00-J06, H65-H68, H70, G00.1, G00.0, A39, A87, G00.2-G03.9, A83-A86, B94.1, G04, A36, A37, A33-A35, B05, B01-B02, P35.8</b>                                                                                                                                                                                                                                                                                                                                                                                                                                                                                                                                                                                                                                                                                                                                    |
| <b>A.2</b> | <b>Diarrheal diseases</b>                                                                       | <b>A00, A02-A04, A06-A09</b>                                                                                                                                                                                                                                                                                                                                                                                                                                                                                                                                                                                                                                                                                                                                                                                                                                                                                                                                   |
| A.2.1      | Cholera                                                                                         | A00                                                                                                                                                                                                                                                                                                                                                                                                                                                                                                                                                                                                                                                                                                                                                                                                                                                                                                                                                            |
| A.2.1.1    | Other salmonella infections                                                                     | A02                                                                                                                                                                                                                                                                                                                                                                                                                                                                                                                                                                                                                                                                                                                                                                                                                                                                                                                                                            |
| A.2.1.2    | Shigellosis                                                                                     | A03                                                                                                                                                                                                                                                                                                                                                                                                                                                                                                                                                                                                                                                                                                                                                                                                                                                                                                                                                            |
| A.2.1.3    | Enteropathogenic E coli infection                                                               | A04.0                                                                                                                                                                                                                                                                                                                                                                                                                                                                                                                                                                                                                                                                                                                                                                                                                                                                                                                                                          |
| A.2.1.4    | Enterotoxigenic E coli infection                                                                | A04.1                                                                                                                                                                                                                                                                                                                                                                                                                                                                                                                                                                                                                                                                                                                                                                                                                                                                                                                                                          |
| A.2.1.5    | Campylobacter enteritis                                                                         | A04.5                                                                                                                                                                                                                                                                                                                                                                                                                                                                                                                                                                                                                                                                                                                                                                                                                                                                                                                                                          |
| A.2.1.6    | Amoebiasis                                                                                      | A06                                                                                                                                                                                                                                                                                                                                                                                                                                                                                                                                                                                                                                                                                                                                                                                                                                                                                                                                                            |
| A.2.1.7    | Cryptosporidiosis                                                                               | A07.2                                                                                                                                                                                                                                                                                                                                                                                                                                                                                                                                                                                                                                                                                                                                                                                                                                                                                                                                                          |
| A.2.1.8    | Rotaviral enteritis                                                                             | A08.0                                                                                                                                                                                                                                                                                                                                                                                                                                                                                                                                                                                                                                                                                                                                                                                                                                                                                                                                                          |
| A.2.1.9    | Other diarrheal diseases                                                                        | A04 (except A04.0, A04.1, A04.5), A07-A09 (except A07.2, A08.0), A05                                                                                                                                                                                                                                                                                                                                                                                                                                                                                                                                                                                                                                                                                                                                                                                                                                                                                           |
| A.2.1.10   | Typhoid and paratyphoid fevers                                                                  | A01                                                                                                                                                                                                                                                                                                                                                                                                                                                                                                                                                                                                                                                                                                                                                                                                                                                                                                                                                            |
| A.2.2      | Lower respiratory infections                                                                    | J09-J22, J85, P23                                                                                                                                                                                                                                                                                                                                                                                                                                                                                                                                                                                                                                                                                                                                                                                                                                                                                                                                              |
| A.2.3      | Influenza                                                                                       | J09-J11                                                                                                                                                                                                                                                                                                                                                                                                                                                                                                                                                                                                                                                                                                                                                                                                                                                                                                                                                        |
| A.2.3.1    | Pneumococcal pneumonia                                                                          | J13                                                                                                                                                                                                                                                                                                                                                                                                                                                                                                                                                                                                                                                                                                                                                                                                                                                                                                                                                            |
| A.2.3.2    | H influenza type B pneumonia                                                                    | J14                                                                                                                                                                                                                                                                                                                                                                                                                                                                                                                                                                                                                                                                                                                                                                                                                                                                                                                                                            |
| A.2.3.3    | Respiratory syncytial virus pneumonia                                                           | J12.1                                                                                                                                                                                                                                                                                                                                                                                                                                                                                                                                                                                                                                                                                                                                                                                                                                                                                                                                                          |
| A.2.3.4    | Other lower respiratory infections                                                              | J12 (except J12.1), J15-J22, J85, P23                                                                                                                                                                                                                                                                                                                                                                                                                                                                                                                                                                                                                                                                                                                                                                                                                                                                                                                          |
| A.2.3.5    | Upper respiratory infections                                                                    | J00-J06                                                                                                                                                                                                                                                                                                                                                                                                                                                                                                                                                                                                                                                                                                                                                                                                                                                                                                                                                        |
| A.2.4      | Otitis media                                                                                    | H65-H68, H70                                                                                                                                                                                                                                                                                                                                                                                                                                                                                                                                                                                                                                                                                                                                                                                                                                                                                                                                                   |
| A.2.5      | Meningitis                                                                                      | G00.1, G00.0, A39, A87, G00.2-G03.9                                                                                                                                                                                                                                                                                                                                                                                                                                                                                                                                                                                                                                                                                                                                                                                                                                                                                                                            |
| A.2.6      | Pneumococcal meningitis                                                                         | G00.1                                                                                                                                                                                                                                                                                                                                                                                                                                                                                                                                                                                                                                                                                                                                                                                                                                                                                                                                                          |
| A.2.6.1    | H influenza type B meningitis                                                                   | G00.0                                                                                                                                                                                                                                                                                                                                                                                                                                                                                                                                                                                                                                                                                                                                                                                                                                                                                                                                                          |
| A.2.6.2    | Meningococcal infection                                                                         | A39                                                                                                                                                                                                                                                                                                                                                                                                                                                                                                                                                                                                                                                                                                                                                                                                                                                                                                                                                            |
| A.2.6.3    | Other meningitis                                                                                | A87, G00.2-G03.9                                                                                                                                                                                                                                                                                                                                                                                                                                                                                                                                                                                                                                                                                                                                                                                                                                                                                                                                               |
| A.2.6.4    | Encephalitis                                                                                    | A83-A86, B94.1, G04                                                                                                                                                                                                                                                                                                                                                                                                                                                                                                                                                                                                                                                                                                                                                                                                                                                                                                                                            |
| A.2.7      | Diphtheria                                                                                      | A36                                                                                                                                                                                                                                                                                                                                                                                                                                                                                                                                                                                                                                                                                                                                                                                                                                                                                                                                                            |
| A.2.8      | Whooping cough                                                                                  | A37                                                                                                                                                                                                                                                                                                                                                                                                                                                                                                                                                                                                                                                                                                                                                                                                                                                                                                                                                            |
| A.2.9      | Tetanus                                                                                         | A33-A35                                                                                                                                                                                                                                                                                                                                                                                                                                                                                                                                                                                                                                                                                                                                                                                                                                                                                                                                                        |
| A.2.10     | Measles                                                                                         | B05                                                                                                                                                                                                                                                                                                                                                                                                                                                                                                                                                                                                                                                                                                                                                                                                                                                                                                                                                            |
| A.2.11     | Varicella                                                                                       | B01-B02, P35.8                                                                                                                                                                                                                                                                                                                                                                                                                                                                                                                                                                                                                                                                                                                                                                                                                                                                                                                                                 |
| A.2.12     | <b>Neglected tropical diseases and malaria</b>                                                  | <b>B50-B54, P37.3, P37.4, B57, B55, B56, B65, B69, B67, B74 (except B74.3, B74.4, B74.8, B74.9)B73, A71**, A74.0**, B94.0**A90-A91, A95, A82, B76, B66</b>                                                                                                                                                                                                                                                                                                                                                                                                                                                                                                                                                                                                                                                                                                                                                                                                     |
| <b>A.3</b> | <b>Malaria</b>                                                                                  | <b>B50-B54, P37.3, P37.4</b>                                                                                                                                                                                                                                                                                                                                                                                                                                                                                                                                                                                                                                                                                                                                                                                                                                                                                                                                   |
| A.3.1      | Chagas disease                                                                                  | B57                                                                                                                                                                                                                                                                                                                                                                                                                                                                                                                                                                                                                                                                                                                                                                                                                                                                                                                                                            |
| A.3.2      | Leishmaniasis                                                                                   | B55                                                                                                                                                                                                                                                                                                                                                                                                                                                                                                                                                                                                                                                                                                                                                                                                                                                                                                                                                            |
| A.3.3      | African trypanosomiasis                                                                         | B56                                                                                                                                                                                                                                                                                                                                                                                                                                                                                                                                                                                                                                                                                                                                                                                                                                                                                                                                                            |
| A.3.4      | Schistosomiasis                                                                                 | B65                                                                                                                                                                                                                                                                                                                                                                                                                                                                                                                                                                                                                                                                                                                                                                                                                                                                                                                                                            |
| A.3.5      | Cysticercosis                                                                                   | B69                                                                                                                                                                                                                                                                                                                                                                                                                                                                                                                                                                                                                                                                                                                                                                                                                                                                                                                                                            |
| A.3.6      | Echinococcosis                                                                                  | B67                                                                                                                                                                                                                                                                                                                                                                                                                                                                                                                                                                                                                                                                                                                                                                                                                                                                                                                                                            |
| A.3.7      | Lymphatic filariasis                                                                            | B74 (except B74.3, B74.4, B74.8, B74.9)                                                                                                                                                                                                                                                                                                                                                                                                                                                                                                                                                                                                                                                                                                                                                                                                                                                                                                                        |
| A.3.8      | Onchocerciasis                                                                                  | B73                                                                                                                                                                                                                                                                                                                                                                                                                                                                                                                                                                                                                                                                                                                                                                                                                                                                                                                                                            |
| A.3.9      | Trachoma                                                                                        | A71**, A74.0**, B94.0**                                                                                                                                                                                                                                                                                                                                                                                                                                                                                                                                                                                                                                                                                                                                                                                                                                                                                                                                        |
| A.3.10     | Dengue                                                                                          | A90-A91                                                                                                                                                                                                                                                                                                                                                                                                                                                                                                                                                                                                                                                                                                                                                                                                                                                                                                                                                        |
| A.3.11     | Yellow fever                                                                                    | A95                                                                                                                                                                                                                                                                                                                                                                                                                                                                                                                                                                                                                                                                                                                                                                                                                                                                                                                                                            |
| A.3.12     | Rabies                                                                                          | A82                                                                                                                                                                                                                                                                                                                                                                                                                                                                                                                                                                                                                                                                                                                                                                                                                                                                                                                                                            |
| A.3.13     | Intestinal nematode infections                                                                  | B77, B79, B76, B68, B70-B71, B78, B80-B81                                                                                                                                                                                                                                                                                                                                                                                                                                                                                                                                                                                                                                                                                                                                                                                                                                                                                                                      |
| A.3.14     | Food-borne trematodiases                                                                        | B66                                                                                                                                                                                                                                                                                                                                                                                                                                                                                                                                                                                                                                                                                                                                                                                                                                                                                                                                                            |
| A.3.15     |                                                                                                 |                                                                                                                                                                                                                                                                                                                                                                                                                                                                                                                                                                                                                                                                                                                                                                                                                                                                                                                                                                |

|            |                                                                         |                                                                                                                                                                                                                                                                                                                                                                                                                                                                                                                                                                                                                                                                                                                                                                                                                                                                                                                                                                                                                                                                                                                                                                                                                                                                                                                                                                                                                                                                                                                                                                                                                                                                                                                                                                                                                                                                                                                                                                                                                                                                                                                                                                                                                                                                                                                                                                                                                                                                                                                                                                                                                                                                                                                                                                                                                                                                                                                                                                                                                                                                                                                                                                                                                                                                                                                                                                                                                                                                                                                                                                                                                                                                  |
|------------|-------------------------------------------------------------------------|------------------------------------------------------------------------------------------------------------------------------------------------------------------------------------------------------------------------------------------------------------------------------------------------------------------------------------------------------------------------------------------------------------------------------------------------------------------------------------------------------------------------------------------------------------------------------------------------------------------------------------------------------------------------------------------------------------------------------------------------------------------------------------------------------------------------------------------------------------------------------------------------------------------------------------------------------------------------------------------------------------------------------------------------------------------------------------------------------------------------------------------------------------------------------------------------------------------------------------------------------------------------------------------------------------------------------------------------------------------------------------------------------------------------------------------------------------------------------------------------------------------------------------------------------------------------------------------------------------------------------------------------------------------------------------------------------------------------------------------------------------------------------------------------------------------------------------------------------------------------------------------------------------------------------------------------------------------------------------------------------------------------------------------------------------------------------------------------------------------------------------------------------------------------------------------------------------------------------------------------------------------------------------------------------------------------------------------------------------------------------------------------------------------------------------------------------------------------------------------------------------------------------------------------------------------------------------------------------------------------------------------------------------------------------------------------------------------------------------------------------------------------------------------------------------------------------------------------------------------------------------------------------------------------------------------------------------------------------------------------------------------------------------------------------------------------------------------------------------------------------------------------------------------------------------------------------------------------------------------------------------------------------------------------------------------------------------------------------------------------------------------------------------------------------------------------------------------------------------------------------------------------------------------------------------------------------------------------------------------------------------------------------------------|
| A.3.16     | Other neglected tropical diseases                                       | A68, A69.2, A75-A79, A92-A94, A96, A98, B58- B64, B72, B74.3-B74.9, B83, P37.1, B70-B71, B78, B80-B81                                                                                                                                                                                                                                                                                                                                                                                                                                                                                                                                                                                                                                                                                                                                                                                                                                                                                                                                                                                                                                                                                                                                                                                                                                                                                                                                                                                                                                                                                                                                                                                                                                                                                                                                                                                                                                                                                                                                                                                                                                                                                                                                                                                                                                                                                                                                                                                                                                                                                                                                                                                                                                                                                                                                                                                                                                                                                                                                                                                                                                                                                                                                                                                                                                                                                                                                                                                                                                                                                                                                                            |
| <b>A.4</b> | <b>Maternal disorders</b>                                               | <b>O00-O99</b>                                                                                                                                                                                                                                                                                                                                                                                                                                                                                                                                                                                                                                                                                                                                                                                                                                                                                                                                                                                                                                                                                                                                                                                                                                                                                                                                                                                                                                                                                                                                                                                                                                                                                                                                                                                                                                                                                                                                                                                                                                                                                                                                                                                                                                                                                                                                                                                                                                                                                                                                                                                                                                                                                                                                                                                                                                                                                                                                                                                                                                                                                                                                                                                                                                                                                                                                                                                                                                                                                                                                                                                                                                                   |
| A.4.1      | Maternal hemorrhage                                                     | O20, O44-O46, O67, O72                                                                                                                                                                                                                                                                                                                                                                                                                                                                                                                                                                                                                                                                                                                                                                                                                                                                                                                                                                                                                                                                                                                                                                                                                                                                                                                                                                                                                                                                                                                                                                                                                                                                                                                                                                                                                                                                                                                                                                                                                                                                                                                                                                                                                                                                                                                                                                                                                                                                                                                                                                                                                                                                                                                                                                                                                                                                                                                                                                                                                                                                                                                                                                                                                                                                                                                                                                                                                                                                                                                                                                                                                                           |
| A.4.2      | Maternal sepsis                                                         | O85-O86                                                                                                                                                                                                                                                                                                                                                                                                                                                                                                                                                                                                                                                                                                                                                                                                                                                                                                                                                                                                                                                                                                                                                                                                                                                                                                                                                                                                                                                                                                                                                                                                                                                                                                                                                                                                                                                                                                                                                                                                                                                                                                                                                                                                                                                                                                                                                                                                                                                                                                                                                                                                                                                                                                                                                                                                                                                                                                                                                                                                                                                                                                                                                                                                                                                                                                                                                                                                                                                                                                                                                                                                                                                          |
| A.4.3      | Hypertensive disorders of pregnancy                                     | O10-O16                                                                                                                                                                                                                                                                                                                                                                                                                                                                                                                                                                                                                                                                                                                                                                                                                                                                                                                                                                                                                                                                                                                                                                                                                                                                                                                                                                                                                                                                                                                                                                                                                                                                                                                                                                                                                                                                                                                                                                                                                                                                                                                                                                                                                                                                                                                                                                                                                                                                                                                                                                                                                                                                                                                                                                                                                                                                                                                                                                                                                                                                                                                                                                                                                                                                                                                                                                                                                                                                                                                                                                                                                                                          |
| A.4.4      | Obstructed labor                                                        | O64-O66                                                                                                                                                                                                                                                                                                                                                                                                                                                                                                                                                                                                                                                                                                                                                                                                                                                                                                                                                                                                                                                                                                                                                                                                                                                                                                                                                                                                                                                                                                                                                                                                                                                                                                                                                                                                                                                                                                                                                                                                                                                                                                                                                                                                                                                                                                                                                                                                                                                                                                                                                                                                                                                                                                                                                                                                                                                                                                                                                                                                                                                                                                                                                                                                                                                                                                                                                                                                                                                                                                                                                                                                                                                          |
| A.4.5      | Abortion                                                                | O00-O08                                                                                                                                                                                                                                                                                                                                                                                                                                                                                                                                                                                                                                                                                                                                                                                                                                                                                                                                                                                                                                                                                                                                                                                                                                                                                                                                                                                                                                                                                                                                                                                                                                                                                                                                                                                                                                                                                                                                                                                                                                                                                                                                                                                                                                                                                                                                                                                                                                                                                                                                                                                                                                                                                                                                                                                                                                                                                                                                                                                                                                                                                                                                                                                                                                                                                                                                                                                                                                                                                                                                                                                                                                                          |
| A.4.6      | Other maternal disorders                                                | O21-O43, O47-O63, O68-O71, O73-O84, O87-O92, O94- O99                                                                                                                                                                                                                                                                                                                                                                                                                                                                                                                                                                                                                                                                                                                                                                                                                                                                                                                                                                                                                                                                                                                                                                                                                                                                                                                                                                                                                                                                                                                                                                                                                                                                                                                                                                                                                                                                                                                                                                                                                                                                                                                                                                                                                                                                                                                                                                                                                                                                                                                                                                                                                                                                                                                                                                                                                                                                                                                                                                                                                                                                                                                                                                                                                                                                                                                                                                                                                                                                                                                                                                                                            |
| <b>A.5</b> | <b>Neonatal disorders</b>                                               | <b>P01.0, P01.1, P07, P22, P25-P28, P61.2, P77, P52, P00, P01.7-P01.9 , P02-P03 , P08.0-P08.2, P10-P15, P20-P21, P24, P70, P90-P91, P36, P38-P39, P01.2-P01.6, P04, P05, P29, P50-P74(except P61.2, P52, P70), P76, P78-P83, P92- P94, P96(except P96.9)</b>                                                                                                                                                                                                                                                                                                                                                                                                                                                                                                                                                                                                                                                                                                                                                                                                                                                                                                                                                                                                                                                                                                                                                                                                                                                                                                                                                                                                                                                                                                                                                                                                                                                                                                                                                                                                                                                                                                                                                                                                                                                                                                                                                                                                                                                                                                                                                                                                                                                                                                                                                                                                                                                                                                                                                                                                                                                                                                                                                                                                                                                                                                                                                                                                                                                                                                                                                                                                     |
| A.5.1      | Preterm birth complications                                             | P01.0, P01.1, P07, P22, P25-P28, P61.2, P77, P52                                                                                                                                                                                                                                                                                                                                                                                                                                                                                                                                                                                                                                                                                                                                                                                                                                                                                                                                                                                                                                                                                                                                                                                                                                                                                                                                                                                                                                                                                                                                                                                                                                                                                                                                                                                                                                                                                                                                                                                                                                                                                                                                                                                                                                                                                                                                                                                                                                                                                                                                                                                                                                                                                                                                                                                                                                                                                                                                                                                                                                                                                                                                                                                                                                                                                                                                                                                                                                                                                                                                                                                                                 |
| A.5.2      | Neonatal encephalopathy (birth asphyxia and birth trauma)               | P00, P01.7-P01.9 P02-P03 , P08.0-P08.2, P10-P15, P20-P21, P24, P70, P90-P91                                                                                                                                                                                                                                                                                                                                                                                                                                                                                                                                                                                                                                                                                                                                                                                                                                                                                                                                                                                                                                                                                                                                                                                                                                                                                                                                                                                                                                                                                                                                                                                                                                                                                                                                                                                                                                                                                                                                                                                                                                                                                                                                                                                                                                                                                                                                                                                                                                                                                                                                                                                                                                                                                                                                                                                                                                                                                                                                                                                                                                                                                                                                                                                                                                                                                                                                                                                                                                                                                                                                                                                      |
| A.5.3      | Sepsis and other infectious disorders of the newborn baby               | P36, P38-P39                                                                                                                                                                                                                                                                                                                                                                                                                                                                                                                                                                                                                                                                                                                                                                                                                                                                                                                                                                                                                                                                                                                                                                                                                                                                                                                                                                                                                                                                                                                                                                                                                                                                                                                                                                                                                                                                                                                                                                                                                                                                                                                                                                                                                                                                                                                                                                                                                                                                                                                                                                                                                                                                                                                                                                                                                                                                                                                                                                                                                                                                                                                                                                                                                                                                                                                                                                                                                                                                                                                                                                                                                                                     |
| A.5.4      | Other neonatal disorders                                                | P01.2-P01.6, P04, P05, P29, P50-P74(except P61.2, P52, P70), P76, P78-P83, P92-P94, P96(except P96.9)                                                                                                                                                                                                                                                                                                                                                                                                                                                                                                                                                                                                                                                                                                                                                                                                                                                                                                                                                                                                                                                                                                                                                                                                                                                                                                                                                                                                                                                                                                                                                                                                                                                                                                                                                                                                                                                                                                                                                                                                                                                                                                                                                                                                                                                                                                                                                                                                                                                                                                                                                                                                                                                                                                                                                                                                                                                                                                                                                                                                                                                                                                                                                                                                                                                                                                                                                                                                                                                                                                                                                            |
| <b>A.6</b> | <b>Nutritional deficiencies</b>                                         | <b>D50-D53, D64.9, E00-E02, E40-E46, E51-E63.9, E64.0, E64.1, E64.2-E64.3, E50</b>                                                                                                                                                                                                                                                                                                                                                                                                                                                                                                                                                                                                                                                                                                                                                                                                                                                                                                                                                                                                                                                                                                                                                                                                                                                                                                                                                                                                                                                                                                                                                                                                                                                                                                                                                                                                                                                                                                                                                                                                                                                                                                                                                                                                                                                                                                                                                                                                                                                                                                                                                                                                                                                                                                                                                                                                                                                                                                                                                                                                                                                                                                                                                                                                                                                                                                                                                                                                                                                                                                                                                                               |
| A.6.1      | Protein-energy malnutrition                                             | E40-E46, E64.0                                                                                                                                                                                                                                                                                                                                                                                                                                                                                                                                                                                                                                                                                                                                                                                                                                                                                                                                                                                                                                                                                                                                                                                                                                                                                                                                                                                                                                                                                                                                                                                                                                                                                                                                                                                                                                                                                                                                                                                                                                                                                                                                                                                                                                                                                                                                                                                                                                                                                                                                                                                                                                                                                                                                                                                                                                                                                                                                                                                                                                                                                                                                                                                                                                                                                                                                                                                                                                                                                                                                                                                                                                                   |
| A.6.2      | Iodine deficiency                                                       | E00-E02                                                                                                                                                                                                                                                                                                                                                                                                                                                                                                                                                                                                                                                                                                                                                                                                                                                                                                                                                                                                                                                                                                                                                                                                                                                                                                                                                                                                                                                                                                                                                                                                                                                                                                                                                                                                                                                                                                                                                                                                                                                                                                                                                                                                                                                                                                                                                                                                                                                                                                                                                                                                                                                                                                                                                                                                                                                                                                                                                                                                                                                                                                                                                                                                                                                                                                                                                                                                                                                                                                                                                                                                                                                          |
| A.6.3      | Vitamin A deficiency                                                    | E50, E64.1                                                                                                                                                                                                                                                                                                                                                                                                                                                                                                                                                                                                                                                                                                                                                                                                                                                                                                                                                                                                                                                                                                                                                                                                                                                                                                                                                                                                                                                                                                                                                                                                                                                                                                                                                                                                                                                                                                                                                                                                                                                                                                                                                                                                                                                                                                                                                                                                                                                                                                                                                                                                                                                                                                                                                                                                                                                                                                                                                                                                                                                                                                                                                                                                                                                                                                                                                                                                                                                                                                                                                                                                                                                       |
| A.6.4      | Iron-deficiency anemia                                                  | D50, D64.9                                                                                                                                                                                                                                                                                                                                                                                                                                                                                                                                                                                                                                                                                                                                                                                                                                                                                                                                                                                                                                                                                                                                                                                                                                                                                                                                                                                                                                                                                                                                                                                                                                                                                                                                                                                                                                                                                                                                                                                                                                                                                                                                                                                                                                                                                                                                                                                                                                                                                                                                                                                                                                                                                                                                                                                                                                                                                                                                                                                                                                                                                                                                                                                                                                                                                                                                                                                                                                                                                                                                                                                                                                                       |
| A.6.5      | Other nutritional deficiencies                                          | D51-D53, E51-E63.9, E64.2-E64.3                                                                                                                                                                                                                                                                                                                                                                                                                                                                                                                                                                                                                                                                                                                                                                                                                                                                                                                                                                                                                                                                                                                                                                                                                                                                                                                                                                                                                                                                                                                                                                                                                                                                                                                                                                                                                                                                                                                                                                                                                                                                                                                                                                                                                                                                                                                                                                                                                                                                                                                                                                                                                                                                                                                                                                                                                                                                                                                                                                                                                                                                                                                                                                                                                                                                                                                                                                                                                                                                                                                                                                                                                                  |
| <b>A.7</b> | <b>Other communicable, maternal, neonatal and nutritional disorders</b> | <b>A20-A28, A30, A31- A32, A38, A42-A49 (except A48.0, A48.3, A49.9), A50-A58, A59**, A60**, A63**B15, A65- A70(except A68), A74 (except A74.0), A80, A81, A88-A89, A99, B03, B04, B06, B16, B17.0, B17.1, B17.2, B25, B26, B27-B49(except B35-B36), B58-B64, B91, B92, N70-N73.9, P35.0, P35.1, P35.2, P35.3, P35.3, P35.8, P35.9, P37.2, P37.5-P37.9</b>                                                                                                                                                                                                                                                                                                                                                                                                                                                                                                                                                                                                                                                                                                                                                                                                                                                                                                                                                                                                                                                                                                                                                                                                                                                                                                                                                                                                                                                                                                                                                                                                                                                                                                                                                                                                                                                                                                                                                                                                                                                                                                                                                                                                                                                                                                                                                                                                                                                                                                                                                                                                                                                                                                                                                                                                                                                                                                                                                                                                                                                                                                                                                                                                                                                                                                       |
| A.7.1      | Sexually transmitted diseases excluding HIV                             | N70-N73.9, A50-A58, A59**, A60**, A63**                                                                                                                                                                                                                                                                                                                                                                                                                                                                                                                                                                                                                                                                                                                                                                                                                                                                                                                                                                                                                                                                                                                                                                                                                                                                                                                                                                                                                                                                                                                                                                                                                                                                                                                                                                                                                                                                                                                                                                                                                                                                                                                                                                                                                                                                                                                                                                                                                                                                                                                                                                                                                                                                                                                                                                                                                                                                                                                                                                                                                                                                                                                                                                                                                                                                                                                                                                                                                                                                                                                                                                                                                          |
| A.7.1.1    | Syphilis                                                                | A50-A53                                                                                                                                                                                                                                                                                                                                                                                                                                                                                                                                                                                                                                                                                                                                                                                                                                                                                                                                                                                                                                                                                                                                                                                                                                                                                                                                                                                                                                                                                                                                                                                                                                                                                                                                                                                                                                                                                                                                                                                                                                                                                                                                                                                                                                                                                                                                                                                                                                                                                                                                                                                                                                                                                                                                                                                                                                                                                                                                                                                                                                                                                                                                                                                                                                                                                                                                                                                                                                                                                                                                                                                                                                                          |
| A.7.1.2    | Sexually transmitted chlamydial diseases                                | A55-A56                                                                                                                                                                                                                                                                                                                                                                                                                                                                                                                                                                                                                                                                                                                                                                                                                                                                                                                                                                                                                                                                                                                                                                                                                                                                                                                                                                                                                                                                                                                                                                                                                                                                                                                                                                                                                                                                                                                                                                                                                                                                                                                                                                                                                                                                                                                                                                                                                                                                                                                                                                                                                                                                                                                                                                                                                                                                                                                                                                                                                                                                                                                                                                                                                                                                                                                                                                                                                                                                                                                                                                                                                                                          |
| A.7.1.3    | Gonococcal infection                                                    | A54                                                                                                                                                                                                                                                                                                                                                                                                                                                                                                                                                                                                                                                                                                                                                                                                                                                                                                                                                                                                                                                                                                                                                                                                                                                                                                                                                                                                                                                                                                                                                                                                                                                                                                                                                                                                                                                                                                                                                                                                                                                                                                                                                                                                                                                                                                                                                                                                                                                                                                                                                                                                                                                                                                                                                                                                                                                                                                                                                                                                                                                                                                                                                                                                                                                                                                                                                                                                                                                                                                                                                                                                                                                              |
| A.7.1.4    | Trichomoniasis                                                          | A59**                                                                                                                                                                                                                                                                                                                                                                                                                                                                                                                                                                                                                                                                                                                                                                                                                                                                                                                                                                                                                                                                                                                                                                                                                                                                                                                                                                                                                                                                                                                                                                                                                                                                                                                                                                                                                                                                                                                                                                                                                                                                                                                                                                                                                                                                                                                                                                                                                                                                                                                                                                                                                                                                                                                                                                                                                                                                                                                                                                                                                                                                                                                                                                                                                                                                                                                                                                                                                                                                                                                                                                                                                                                            |
| A.7.1.5    | Other sexually transmitted diseases                                     | A57-A58, A60**, A63**                                                                                                                                                                                                                                                                                                                                                                                                                                                                                                                                                                                                                                                                                                                                                                                                                                                                                                                                                                                                                                                                                                                                                                                                                                                                                                                                                                                                                                                                                                                                                                                                                                                                                                                                                                                                                                                                                                                                                                                                                                                                                                                                                                                                                                                                                                                                                                                                                                                                                                                                                                                                                                                                                                                                                                                                                                                                                                                                                                                                                                                                                                                                                                                                                                                                                                                                                                                                                                                                                                                                                                                                                                            |
| A.7.2      | Hepatitis                                                               | B15, B16, B17.0, P35.3, P35.3, B17.1, B17.2                                                                                                                                                                                                                                                                                                                                                                                                                                                                                                                                                                                                                                                                                                                                                                                                                                                                                                                                                                                                                                                                                                                                                                                                                                                                                                                                                                                                                                                                                                                                                                                                                                                                                                                                                                                                                                                                                                                                                                                                                                                                                                                                                                                                                                                                                                                                                                                                                                                                                                                                                                                                                                                                                                                                                                                                                                                                                                                                                                                                                                                                                                                                                                                                                                                                                                                                                                                                                                                                                                                                                                                                                      |
| A.7.2.1    | Acute hepatitis A                                                       | B15                                                                                                                                                                                                                                                                                                                                                                                                                                                                                                                                                                                                                                                                                                                                                                                                                                                                                                                                                                                                                                                                                                                                                                                                                                                                                                                                                                                                                                                                                                                                                                                                                                                                                                                                                                                                                                                                                                                                                                                                                                                                                                                                                                                                                                                                                                                                                                                                                                                                                                                                                                                                                                                                                                                                                                                                                                                                                                                                                                                                                                                                                                                                                                                                                                                                                                                                                                                                                                                                                                                                                                                                                                                              |
| A.7.2.2    | Acute hepatitis B                                                       | B16, B17.0, P35.3                                                                                                                                                                                                                                                                                                                                                                                                                                                                                                                                                                                                                                                                                                                                                                                                                                                                                                                                                                                                                                                                                                                                                                                                                                                                                                                                                                                                                                                                                                                                                                                                                                                                                                                                                                                                                                                                                                                                                                                                                                                                                                                                                                                                                                                                                                                                                                                                                                                                                                                                                                                                                                                                                                                                                                                                                                                                                                                                                                                                                                                                                                                                                                                                                                                                                                                                                                                                                                                                                                                                                                                                                                                |
| A.7.2.3    | Acute hepatitis C                                                       | B17.1                                                                                                                                                                                                                                                                                                                                                                                                                                                                                                                                                                                                                                                                                                                                                                                                                                                                                                                                                                                                                                                                                                                                                                                                                                                                                                                                                                                                                                                                                                                                                                                                                                                                                                                                                                                                                                                                                                                                                                                                                                                                                                                                                                                                                                                                                                                                                                                                                                                                                                                                                                                                                                                                                                                                                                                                                                                                                                                                                                                                                                                                                                                                                                                                                                                                                                                                                                                                                                                                                                                                                                                                                                                            |
| A.7.2.4    | Acute hepatitis E                                                       | B17.2                                                                                                                                                                                                                                                                                                                                                                                                                                                                                                                                                                                                                                                                                                                                                                                                                                                                                                                                                                                                                                                                                                                                                                                                                                                                                                                                                                                                                                                                                                                                                                                                                                                                                                                                                                                                                                                                                                                                                                                                                                                                                                                                                                                                                                                                                                                                                                                                                                                                                                                                                                                                                                                                                                                                                                                                                                                                                                                                                                                                                                                                                                                                                                                                                                                                                                                                                                                                                                                                                                                                                                                                                                                            |
| A.7.3      | Leprosy                                                                 | A30, B92                                                                                                                                                                                                                                                                                                                                                                                                                                                                                                                                                                                                                                                                                                                                                                                                                                                                                                                                                                                                                                                                                                                                                                                                                                                                                                                                                                                                                                                                                                                                                                                                                                                                                                                                                                                                                                                                                                                                                                                                                                                                                                                                                                                                                                                                                                                                                                                                                                                                                                                                                                                                                                                                                                                                                                                                                                                                                                                                                                                                                                                                                                                                                                                                                                                                                                                                                                                                                                                                                                                                                                                                                                                         |
| A.7.4      | Other infectious diseases                                               | A20-A28, A31-A32, A38, A42-A49 (except A48.0, A48.3, A49.9), A65-A70(except A68), A74 (except A74.0), A81, A88-A89, A99, B04, B25, B27-B49(except B35-B36), B58-B64, P35.1, P35.2, P35.8, P35.9, P37.2, P37.5-P37.9, B03, B26, B06, P35.0, A80, B91                                                                                                                                                                                                                                                                                                                                                                                                                                                                                                                                                                                                                                                                                                                                                                                                                                                                                                                                                                                                                                                                                                                                                                                                                                                                                                                                                                                                                                                                                                                                                                                                                                                                                                                                                                                                                                                                                                                                                                                                                                                                                                                                                                                                                                                                                                                                                                                                                                                                                                                                                                                                                                                                                                                                                                                                                                                                                                                                                                                                                                                                                                                                                                                                                                                                                                                                                                                                              |
| <b>B</b>   | <b>Non-communicable diseases</b>                                        | <b>B07**-B09**, L70**, L63.0**, B18, B35**, B36.0**, B36.1**, B36.2**, B36.3**, B36.8**, B36.9** B00, B66, B85**, B87**, B88**, C09-C13, C15-C15.9, C17, C22, C23, C24, C25, C30-C31, C33-C34, C37-C41, C43, C45, C47-C49, C51-C52, C57-C60(except C57.9), C63(except C63.9), C68- C69, C74-C75 (except C75.9), C77-C79, C82-C85, C88- C90, C91-C95, C96, C97, D0.5-D05.9*, D00.1*C16, D00.2*, D00-D24, D01.0-D01.3*, D01.4*, D01.5*, D02.0*, D02.1-D02.2*, D03*, D04*C56, D06*C54, D07.0, D07.1-D07.4*, D07.5*, D09.0*, D09.1-D09.3*, D25, D26- D44.2, D37.1*, D37.2*, D37.3- D37.5*C00-C08, D37.6*C32, D37.7*, D38.0*, D38.1*C50, D38.2- D38.5*, D39.0*C61, D39.1*C62, D39.2-D39.7*, D40.0*C18-C21, D40.1*C64- C66, D40.7*, D41.0-D41.2*C67, D41.4*C70-C72, D41.7*, D42- D43.9*, D44.0*C81, D44.1-D44.2*, D44.3-D44.5*C73, D44.6-D44.9*, D44.6-D48.9**I01, D48.0-D48.4*, D48.5*C44, D48.6*C53, D48.7*, D55-D59, D60-D64(except D64.9), D66-D89 (except D84.9, D86.0, D86.0, D86.2, D86.2, D86.9), D86.9, E03-E07, E10.2, E11.2, E11.2, E12.2, E12.2, E13.2), E13.2, E15-E34, E28.2, E65-E67, E70-E85 (except E85.3, E85.4, E85.8, E85.9), E88 (except E88.9), E89-E96, F00-F03, F04-F09, F10, F11, F12, F13, F14, F15, F16, F17, F18-F19, F20-F29, F32**-F33**, F34.1**F30**-F31**F40**- F42**, F34-F39 (except F34.1), F43**-F44**F50, F45-F48**, F51-F53**, F54-F59, F60-F69**, F70**- F79**, F70**- F79**, F80-F84** (except F84.0, F84.5, F84.9), F88-F89**E10- E13 (except E10.2, F90**, F91**-F92**, F93-F98**, G06-G08, G10-G12, G20-G21, G23-G25, G30-G31, G35, G36-G37, G40-G41, G43**, G44**, G45, G47-G58**, G60-G72, G90-G91 (except G91.1, G91.3, G91.8), G93.2, G93.3, G93.4, G93.5, G93.6), G93-G98 (except G93.1, H00-H21**, H25- H26**, H27, H30-H35** (except H35.3), H35.3**, H40**, H43-H47**, H49-H52**, H53-H54**, H55- H61**, H68-H69**, H71-H83**, H90-H91**, H92- H93**, I00, I02.0, I02.9, I05-I09, I11, I12.0, I12.9, I13.1, I13.2, I13.9, I20-I25, I27-I28 (except I27.1), I30-I32(except I31.2, I31.3), I33, I34-I39, I40, I42, I47, I48, I60-I63 I65-I67, I69.0, I69.1, I69.2, I69.3, I70.2, I70.8, I71, I72, I73, I77-I80, I82-I84, I85, I85, I86- I98, J30-J39, J40-J44, J45-J46, J47, J60-J65, J66-J70(except J69), J82, J84, J92, J93.0, J93.1, J95, J98 (except J98.1, J98.2, J98.3, J98.9)B18, K00-K01**, K02**, K03-K04**, K05**, K06-K11**, K12-K13, K14**, K20-K22, K25-K27, K28, K29, K30-K31, K35-K37, K38, K40-K41, K50-K52, K55, K56, K57-K63, K66.8, K70, K70, K71.7, K71.7, K72.1-K72.9, K72.1-K72.9, K73- K74, K73-K74, K75.2-K75.9, K75.2-K75.9, K76.6- K76.7, K76.6-K76.7, K76.9, K76.9, K760-K765, K768, K77, K80-K83, K85- K86.9, K90-K92 (except K92.0, K92.1, K92.2, K92.9), L00, L01, L02, L03.0, L03.1**, L03.2- L03.9, L04**, L05.0, L05.9, L08, L10-L13, L28**, L29**, L30**, L40**-L41**, L42**-L44**, L50**-L89, L51, L52**-L53**, L55**-L60**, L63.1**, L63.8**, L63.9**, L64**-L68**, L71**-L75**, L80**-L85**, L87, L88, L90**-L92**, L93, L94-L95, L97, L98.0-L98.4**, M00-M02, M05-M06, M08, M10**, M11**, M12-M13, M15-M19**, M20-M25**, M30-M35, M40**, M41-M46 (except M46.9), M46.9, M47**, M48** (except M48.0, M48.0-M48.2**, M48.1, M48.2, M48.8**- M48.9**, M48.8, M48.9), M50-M54**, M60**, M61-M62, M65-M71**, M72, M75- M79**, M80-M85, M87-M94, M95-M99**, N00-N01, N02- N07, N10-N12, N13, N15.0, N15.1-N15.9, N20-N28, N30-N32, N34, N35-N36, N39.0, N39.1-N39.9, N40**, N41-N45, N46**, N47-N50, N80, N81, N94.3, N97**, Q00, Q01-Q02, Q03, Q04, Q05, Q06-Q18, Q20-Q28, Q30-Q34, Q35-Q37, Q38-Q45, Q50-Q89 (except Q89.9) L20**-L28**, Q90, Q91-Q99 (except Q99.9), R95, X45</b> |
| <b>B.1</b> | <b>Neoplasms</b>                                                        | <b>C15-C159, D00.1*C16, D00.2*, D37.1*, C22, D01.5*, D37.6*C32, D02.0*, D38.0*, C33-C34, D02.1-D02.2*, D38.1*C50, D0.5-D05.9*, D48.6*C53, D06*C54, D07.0, D39.0*C61, D07.5*, D40.0*C18-C21, D01.0-D01.3*, D37.3- D37.5*C00-C08, C11, C09-C10, C12-C13, C23, C24, C25, C43, D03*, D48.5*C44, D04*C56, D39.1*C62, D40.1*C64- C66, D41.0-D41.2*C67, D09.0, D41.4*C70-C72, D42- D43.9*, D44.3-D44.5*C73, D44.0*C81, C82-C85, C96, C88- C90, C91-C95, C17, C30-C31, C37-C41, C45, C47-C49, C51-C52, C57-C60(except C57.9), C68- C69, C74-C75 (except C75.9), C77-C79, C97, D01.4*, D07.1-D07.4*, D09.1-D09.3*, D37.2*, D37.7*, D38.2- D38.5*, D39.2-D39.7*, D40.7*, D41.7*, D44.1-D44.2*, D44.6-D44.9*, D48.0-D48.4*, D48.7*, D00-D24, D26- D44.2, D44.6-D48.9**</b>                                                                                                                                                                                                                                                                                                                                                                                                                                                                                                                                                                                                                                                                                                                                                                                                                                                                                                                                                                                                                                                                                                                                                                                                                                                                                                                                                                                                                                                                                                                                                                                                                                                                                                                                                                                                                                                                                                                                                                                                                                                                                                                                                                                                                                                                                                                                                                                                                                                                                                                                                                                                                                                                                                                                                                                                                                                                                                  |
| B.1.1      | Esophageal cancer                                                       | C15-C159, D00.1*                                                                                                                                                                                                                                                                                                                                                                                                                                                                                                                                                                                                                                                                                                                                                                                                                                                                                                                                                                                                                                                                                                                                                                                                                                                                                                                                                                                                                                                                                                                                                                                                                                                                                                                                                                                                                                                                                                                                                                                                                                                                                                                                                                                                                                                                                                                                                                                                                                                                                                                                                                                                                                                                                                                                                                                                                                                                                                                                                                                                                                                                                                                                                                                                                                                                                                                                                                                                                                                                                                                                                                                                                                                 |
| B.1.2      | Stomach cancer                                                          | C16, D00.2*, D37.1*                                                                                                                                                                                                                                                                                                                                                                                                                                                                                                                                                                                                                                                                                                                                                                                                                                                                                                                                                                                                                                                                                                                                                                                                                                                                                                                                                                                                                                                                                                                                                                                                                                                                                                                                                                                                                                                                                                                                                                                                                                                                                                                                                                                                                                                                                                                                                                                                                                                                                                                                                                                                                                                                                                                                                                                                                                                                                                                                                                                                                                                                                                                                                                                                                                                                                                                                                                                                                                                                                                                                                                                                                                              |
| B.1.3      | Liver cancer                                                            | C22, D01.5*, D37.6*                                                                                                                                                                                                                                                                                                                                                                                                                                                                                                                                                                                                                                                                                                                                                                                                                                                                                                                                                                                                                                                                                                                                                                                                                                                                                                                                                                                                                                                                                                                                                                                                                                                                                                                                                                                                                                                                                                                                                                                                                                                                                                                                                                                                                                                                                                                                                                                                                                                                                                                                                                                                                                                                                                                                                                                                                                                                                                                                                                                                                                                                                                                                                                                                                                                                                                                                                                                                                                                                                                                                                                                                                                              |



|            |                                                           |                                                                                                                                                                                                                                                                                                                               |
|------------|-----------------------------------------------------------|-------------------------------------------------------------------------------------------------------------------------------------------------------------------------------------------------------------------------------------------------------------------------------------------------------------------------------|
| B.1.3.1    | Liver cancer secondary to hepatitis B                     |                                                                                                                                                                                                                                                                                                                               |
| B.1.3.2    | Liver cancer secondary to hepatitis C                     |                                                                                                                                                                                                                                                                                                                               |
| B.1.3.3    | Liver cancer secondary to alcohol use                     |                                                                                                                                                                                                                                                                                                                               |
| B.1.3.4    | Other liver cancer                                        |                                                                                                                                                                                                                                                                                                                               |
| B.1.4      | Larynx cancer                                             | C32, D02.0*, D38.0*                                                                                                                                                                                                                                                                                                           |
| B.1.5      | Trachea, bronchus and lung cancers                        | C33-C34 , D02.1-D02.2*, D38.1*                                                                                                                                                                                                                                                                                                |
| B.1.6      | Breast cancer                                             | C50, D0.5-D05.9*, D48.6*                                                                                                                                                                                                                                                                                                      |
| B.1.7      | Cervical cancer                                           | C53, D06*                                                                                                                                                                                                                                                                                                                     |
| B.1.8      | Uterine cancer                                            | C54, D07.0, D39.0*                                                                                                                                                                                                                                                                                                            |
| B.1.9      | Prostate cancer                                           | C61, D07.5*, D40.0*                                                                                                                                                                                                                                                                                                           |
| B.1.10     | Colon and rectum cancers                                  | C18-C21, D01.0-D01.3*, D37.3-D37.5*                                                                                                                                                                                                                                                                                           |
| B.1.11     | Mouth cancer                                              | C00-C08                                                                                                                                                                                                                                                                                                                       |
| B.1.12     | Nasopharynx cancer                                        | C11                                                                                                                                                                                                                                                                                                                           |
| B.1.13     | Cancer of other part of pharynx and oropharynx            | C09-C10, C12-C13                                                                                                                                                                                                                                                                                                              |
| B.1.14     | Gallbladder and biliary tract cancer                      | C23, C24                                                                                                                                                                                                                                                                                                                      |
| B.1.15     | Pancreatic cancer                                         | C25                                                                                                                                                                                                                                                                                                                           |
| B.1.16     | Malignant melanoma of skin                                | C43, D03*, D48.5*                                                                                                                                                                                                                                                                                                             |
| B.1.17     | Non-melanoma skin cancer                                  | C44, D04*                                                                                                                                                                                                                                                                                                                     |
| B.1.18     | Ovarian cancer                                            | C56, D39.1*                                                                                                                                                                                                                                                                                                                   |
| B.1.19     | Testicular cancer                                         | C62, D40.1*                                                                                                                                                                                                                                                                                                                   |
| B.1.20     | Kidney and other urinary organ cancers                    | C64-C66, D41.0-D41.2*                                                                                                                                                                                                                                                                                                         |
| B.1.21     | Bladder cancer                                            | C67, D09.0*, D41.4*                                                                                                                                                                                                                                                                                                           |
| B.1.22     | Brain and nervous system cancers                          | C70-C72, D42-D43.9*, D44.3-D44.5*                                                                                                                                                                                                                                                                                             |
| B.1.23     | Thyroid cancer                                            | C73, D44.0*                                                                                                                                                                                                                                                                                                                   |
| B.1.24     | Hodgkin's disease                                         | C81                                                                                                                                                                                                                                                                                                                           |
| B.1.25     | Non-Hodgkin's lymphoma                                    | C82-C85, C96                                                                                                                                                                                                                                                                                                                  |
| B.1.26     | Multiple myeloma                                          | C88-C90                                                                                                                                                                                                                                                                                                                       |
| B.1.27     | Leukemia                                                  | C91-C95                                                                                                                                                                                                                                                                                                                       |
| B.1.28     | Other neoplasms                                           | C17, C30-C31, C37-C41, C45, C47-C49, C51-C52, C57- C60(except C57.9), C63(except C63.9), C68-C69, C74-C75 (except C75.9), C77-C79, C97, D00-D24, D01.4*, D07.1-D07.4*, D09.1-D09.3*, D26-D44.2, D37.2*, D37.7*, D38.2-D38.5*, D39.2- D39.7*, D40.7*, D41.7*, D44.1-D44.2*, D44.6- D48.9**, D44.6-D44.9*, D48.0-D48.4*, D48.7* |
| <b>B.2</b> | <b>Cardiovascular and circulatory diseases</b>            | <b>G45, I00, I01, I02.0, I02.9, I05-I09, I11, I20-I25, I27-I28 (except I27.1), I30-I32(except I31.2, I31.3), I33, I34-I39, I40, I42, I47, I48, I60-I63 I65-I67, I69.0, I69.1, I69.2, I69.3, I70.2, I70.8, I71, I72, I73, I77-I80, I82-I84, I86-I98</b>                                                                        |
| B.2.1      | Rheumatic heart disease                                   | I01, I02.0, I05-I09                                                                                                                                                                                                                                                                                                           |
| B.2.2      | Ischemic heart disease                                    | I20-I25                                                                                                                                                                                                                                                                                                                       |
| B.2.3      | Cerebrovascular disease                                   | I60-I63 I65-I67, I69.0, I69.1, I69.2, I69.3                                                                                                                                                                                                                                                                                   |
| B.2.3.1    | Ischemic stroke                                           | I63, I65-I67(except I67.4), I69.3                                                                                                                                                                                                                                                                                             |
| B.2.3.2    | Hemorrhagic and other non- ischemic stroke                | I60-I62, I69.0-I69.2, I67.4                                                                                                                                                                                                                                                                                                   |
| B.2.4      | Hypertensive heart disease                                | I11                                                                                                                                                                                                                                                                                                                           |
| B.2.5      | Cardiomyopathy and myocarditis                            | I42, I40                                                                                                                                                                                                                                                                                                                      |
| B.2.6      | Atrial fibrillation and flutter                           | I48                                                                                                                                                                                                                                                                                                                           |
| B.2.7      | Aortic aneurysm                                           | I71                                                                                                                                                                                                                                                                                                                           |
| B.2.8      | Peripheral vascular disease                               | I73, I70.2                                                                                                                                                                                                                                                                                                                    |
| B.2.9      | Endocarditis                                              | I33                                                                                                                                                                                                                                                                                                                           |
| B.2.10     | Other cardiovascular and circulatory diseases             | I00,I02.9,I27-I28 (except I27.1),I30-I32(except I31.2, I31.3), I34-I39, I47, I70.8, I72, I77-I80, I82-I84, I86-I98, G45                                                                                                                                                                                                       |
| <b>B.3</b> | <b>Chronic respiratory diseases</b>                       | <b>B18, D86.0, D86.2, D86.9, I85, J40-J44, J45-J46, J47J, J60-J65, J66-J70(except J69), J82, J84J30- J39, J92, J93.0, J93.1, J95, J98 (except J98.1, J98.2, J98.3, J98.9), K70, K71.7, K72.1-K72.9, K73-K74, K75.2-K75.9, K76.6-K76.7, K76.9</b>                                                                              |
| B.3.1      | Chronic obstructive pulmonary disease                     | J40-J44, J47                                                                                                                                                                                                                                                                                                                  |
| B.3.2      | Pneumoconiosis                                            | J60-J65                                                                                                                                                                                                                                                                                                                       |
| B.3.3      | Asthma                                                    | J45-J46                                                                                                                                                                                                                                                                                                                       |
| B.3.4      | Interstitial lung disease and pulmonary sarcoidosis       | D86.0, D86.2, D86.9, J84                                                                                                                                                                                                                                                                                                      |
| B.3.5      | Other chronic respiratory diseases                        | J30-J39, J66-J70(except J69), J82, J92, J93.0, J93.1, J95, J98 (except J98.1, J98.2, J98.3, J98.9)                                                                                                                                                                                                                            |
| <b>B.4</b> | <b>Cirrhosis of the liver</b>                             | <b>B18, I85, K70, K71.7, K72.1-K72.9, K73-K74, K75.2-K75.9, K76.6-K76.7, K76.9</b>                                                                                                                                                                                                                                            |
| B.4.1      | Cirrhosis of the liver secondary to hepatitis B           |                                                                                                                                                                                                                                                                                                                               |
| B.4.2      | Cirrhosis of the liver secondary to hepatitis C           |                                                                                                                                                                                                                                                                                                                               |
| B.4.3      | Cirrhosis of the liver secondary to alcohol use           |                                                                                                                                                                                                                                                                                                                               |
| B.4.4      | Other cirrhosis of the liver                              |                                                                                                                                                                                                                                                                                                                               |
| <b>B.5</b> | <b>Digestive diseases (except cirrhosis)</b>              | <b>K25-K27, K29, K35-K37, K56, K40-K41, K50-K52, K55, K80-K83, K85-K86.9, K00-K01**, K03-K04**, K06-K11**, K12-K13, K14**, K20-K22, K28, K30-K31, K38, K57-K63, K66.8, K760-K765, K768, K77, K90-K92 (except K92.0, K92.1, K92.2, K92.9)</b>                                                                                  |
| B.5.1      | Peptic ulcer disease                                      | K25-K27                                                                                                                                                                                                                                                                                                                       |
| B.5.2      | Gastritis and duodenitis                                  | K29                                                                                                                                                                                                                                                                                                                           |
| B.5.3      | Appendicitis                                              | K35-K37                                                                                                                                                                                                                                                                                                                       |
| B.5.4      | Paralytic ileus and intestinal obstruction without hernia | K56                                                                                                                                                                                                                                                                                                                           |
| B.5.5      | Inguinal or femoral hernia                                | K40-K41                                                                                                                                                                                                                                                                                                                       |
| B.5.6      | Noninfective inflammatory bowel disease                   | K50-K52                                                                                                                                                                                                                                                                                                                       |
| B.5.7      | Vascular disorders of intestine                           | K55                                                                                                                                                                                                                                                                                                                           |

|            |                                                                        |                                                                                                                                                                                                                                                                                                                                                                                                                                                                                          |
|------------|------------------------------------------------------------------------|------------------------------------------------------------------------------------------------------------------------------------------------------------------------------------------------------------------------------------------------------------------------------------------------------------------------------------------------------------------------------------------------------------------------------------------------------------------------------------------|
| B.5.8      | Gall bladder and bile duct disease                                     | K80-K83                                                                                                                                                                                                                                                                                                                                                                                                                                                                                  |
| B.5.9      | Pancreatitis                                                           | K85-K86.9                                                                                                                                                                                                                                                                                                                                                                                                                                                                                |
| B.5.10     | Other digestive diseases                                               | K00-K01**, K03-K04**, K06-K11**, K12-K13, K14**, K20-K22, K28, K30-K31, K38, K57-K63, K66.8, K760- K765, K768, K77, K90-K92 (except K92.0, K92.1, K92.2, K92.9)                                                                                                                                                                                                                                                                                                                          |
| <b>B.6</b> | <b>Neurological disorders</b>                                          | <b>F00-F03, G30-G31, G20-G21, G40-G41, G35, G43**, G44**, G06-G08, G10-G12, G23-G25, G36-G37, G47- G58**, G60-G72, G90-G91 (except G91.1, G91.3, G91.8), G93-G98 (except G93.1, G93.2, G93.3, G93.4, G93.5, G93.6)</b>                                                                                                                                                                                                                                                                   |
| B.6.1      | Alzheimer's disease and other dementias                                | F00-F03, G30-G31                                                                                                                                                                                                                                                                                                                                                                                                                                                                         |
| B.6.2      | Parkinson's disease                                                    | G20-G21                                                                                                                                                                                                                                                                                                                                                                                                                                                                                  |
| B.6.3      | Epilepsy                                                               | G40-G41                                                                                                                                                                                                                                                                                                                                                                                                                                                                                  |
| B.6.4      | Multiple sclerosis                                                     | G35                                                                                                                                                                                                                                                                                                                                                                                                                                                                                      |
| B.6.5      | Migraine                                                               | G43**                                                                                                                                                                                                                                                                                                                                                                                                                                                                                    |
| B.6.6      | Tension-type headache                                                  | G44**                                                                                                                                                                                                                                                                                                                                                                                                                                                                                    |
| B.6.7      | Other neurological disorders                                           | G06-G08, G10-G12, G23-G25, G36-G37, G47-G58**, G60- G72, G90-G91 (except G91.1, G91.3, G91.8), G93-G98 (except G93.1, G93.2, G93.3, G93.4, G93.5, G93.6)                                                                                                                                                                                                                                                                                                                                 |
| <b>B.7</b> | <b>Mental and behavioral disorders</b>                                 | <b>F20-F29, F10, X45, Q86.0, F11, F14, F15, F12, F13, F16, F18-F19, X41, X42,X49, F32**-F33**, F34.1**F30**- F31**, F40**-F42**, F43**-F44**F50, F90**, F91**-F92**, F70**-F79**, F70**-F79**, F04-F09, F17, F34-F39 (except F34.1), F45-F48**, F51-F53**, F54-F59, F60-F69**, F80- F84** (except F84.0, F84.5, F84.9), F93-F98**, F88-F89**</b>                                                                                                                                         |
| B.7.1      | Schizophrenia                                                          | F20-F29                                                                                                                                                                                                                                                                                                                                                                                                                                                                                  |
| B.7.2      | Alcohol use disorders                                                  | F10, X45, Q86.0                                                                                                                                                                                                                                                                                                                                                                                                                                                                          |
| B.7.3      | Drug use disorders                                                     | F11, F14, F15, F12, F13, F16, F18-F19, X41, X42, X49                                                                                                                                                                                                                                                                                                                                                                                                                                     |
| B.7.3.1    | Opioid use disorders                                                   | F11                                                                                                                                                                                                                                                                                                                                                                                                                                                                                      |
| B.7.3.2    | Cocaine use disorders                                                  | F14                                                                                                                                                                                                                                                                                                                                                                                                                                                                                      |
| B.7.3.3    | Amphetamine use disorders                                              | F15                                                                                                                                                                                                                                                                                                                                                                                                                                                                                      |
| B.7.3.4    | Cannabis use disorders                                                 | F12                                                                                                                                                                                                                                                                                                                                                                                                                                                                                      |
| B.7.3.5    | Other drug use disorders                                               | F13, F16, F18-F19                                                                                                                                                                                                                                                                                                                                                                                                                                                                        |
| B.7.4      | Unipolar depressive disorders                                          | F32**-F33**, F34.1**                                                                                                                                                                                                                                                                                                                                                                                                                                                                     |
| B.7.4.1    | Major depressive disorder                                              | F32**-F33**                                                                                                                                                                                                                                                                                                                                                                                                                                                                              |
| B.7.4.2    | Dysthymia                                                              | F34.1**                                                                                                                                                                                                                                                                                                                                                                                                                                                                                  |
| B.7.5      | Bipolar affective disorder                                             | F30**-F31**                                                                                                                                                                                                                                                                                                                                                                                                                                                                              |
| B.7.6      | Anxiety disorders                                                      | F40**-F42**, F43**-F44**                                                                                                                                                                                                                                                                                                                                                                                                                                                                 |
| B.7.7      | Eating disorders                                                       | F50                                                                                                                                                                                                                                                                                                                                                                                                                                                                                      |
| B.7.8      | Pervasive development disorders                                        | F84.0**, F84.5**                                                                                                                                                                                                                                                                                                                                                                                                                                                                         |
| B.7.8.1    | Autism                                                                 | F84.0**                                                                                                                                                                                                                                                                                                                                                                                                                                                                                  |
| B.7.8.2    | Asperger's syndrome                                                    | F84.5**                                                                                                                                                                                                                                                                                                                                                                                                                                                                                  |
| B.7.9      | Childhood behavioral disorders                                         | F90**, F91**-F92**, F70**-F79**                                                                                                                                                                                                                                                                                                                                                                                                                                                          |
| B.7.9.1    | Attention-deficit hyperactivity disorder                               | F90**                                                                                                                                                                                                                                                                                                                                                                                                                                                                                    |
| B.7.9.2    | Conduct disorder                                                       | F91**-F92**                                                                                                                                                                                                                                                                                                                                                                                                                                                                              |
| B.7.10     | Idiopathic intellectual disability                                     | F70**-F79**                                                                                                                                                                                                                                                                                                                                                                                                                                                                              |
| B.7.11     | Other mental and behavioral disorders                                  | F04-F09, F17, F34-F39 (except F34.1), F45-F48**, F51- F53**, F54-F59, F60-F69**, F80-F84** (except F84.0, F84.5, F84.9), F93-F98**, F88-F89**                                                                                                                                                                                                                                                                                                                                            |
| <b>B.8</b> | <b>Diabetes, urogenital, blood, and endocrine diseases</b>             | <b>D55-D59, D60-D64(except D64.9), D66-D89 (except D84.9, D86.0, D86.2, D86.9), E03-E07, E10.2, E10-E13 (except E10.2, E11.2, E11.2, E12.2, E12.2, E13.2), E13.2, E15-E34, E28.2, E65-E67, E70-E85 (except E85.3, E85.4, E85.8, E85.9), E88 (except E88.9), E89-E96, I12.0, I12.9, I13.1, I13.2, I13.9, N00-N01, N02-N07, N10-N12, N13, N15.0, N15.1-N15.9, N20-N23, N24-N28, N30, N31-N32, N34, N35-N36, N39.0, N39.1-N39.9, N40**, N41-N45, N46**, N47-N50, N80, N81, N94.3, N97**</b> |
| B.8.1      | Diabetes mellitus                                                      | E10-E13 (except E10.2, E11.2, E12.2, E13.2)                                                                                                                                                                                                                                                                                                                                                                                                                                              |
| B.8.2      | Acute glomerulonephritis                                               | N00-N01                                                                                                                                                                                                                                                                                                                                                                                                                                                                                  |
| B.8.3      | Chronic kidney diseases                                                | E10.2, E11.2, E12.2, E13.2, I12.0, I12.9, I13.1, I13.2, I13.9, N02-N07, N15.0                                                                                                                                                                                                                                                                                                                                                                                                            |
| B.8.3.1    | Chronic kidney disease due to diabetes mellitus                        | E10.2, E11.2, E12.2, E13.2, E14.2                                                                                                                                                                                                                                                                                                                                                                                                                                                        |
| B.8.3.2    | Chronic kidney disease due to hypertension                             | I12.0, I12.9, I13.0, I13.1, I13.2, I13.9                                                                                                                                                                                                                                                                                                                                                                                                                                                 |
| B.8.3.3    | Chronic kidney disease unspecified                                     | N02-N07, N15.0                                                                                                                                                                                                                                                                                                                                                                                                                                                                           |
| B.8.4      | Urinary diseases and male infertility                                  | N10-N12, N15.1-N15.9, N30, N34, N39.0,N20-N23, N40**, N46**, N13, N24-N28, N31-N32, N35-N36, N39.1-N39.9, N41-N45, N47-N50                                                                                                                                                                                                                                                                                                                                                               |
| B.8.4.1    | Tubulointerstitial nephritis, pyelonephritis, and urinary tract infect | N10-N12, N15.1-N15.9, N30, N34, N39.0                                                                                                                                                                                                                                                                                                                                                                                                                                                    |
| B.8.4.2    | Urolithiasis                                                           | N20-N23                                                                                                                                                                                                                                                                                                                                                                                                                                                                                  |
| B.8.4.3    | Benign prostatic hyperplasia                                           | N40**                                                                                                                                                                                                                                                                                                                                                                                                                                                                                    |
| B.8.4.4    | Male infertility                                                       | N46**                                                                                                                                                                                                                                                                                                                                                                                                                                                                                    |
| B.8.4.5    | Other urinary diseases                                                 | N13, N24-N28, N31-N32, N35-N36, N39.1-N39.9, N41- N45, N47-N50                                                                                                                                                                                                                                                                                                                                                                                                                           |
| B.8.5      | Gynecological diseases                                                 | D25, E28.2, N97**, N80, N81, N94.3                                                                                                                                                                                                                                                                                                                                                                                                                                                       |
| B.8.5.1    | Uterine fibroids                                                       | D25                                                                                                                                                                                                                                                                                                                                                                                                                                                                                      |
| B.8.5.2    | Polycystic ovarian syndrome                                            | E28.2                                                                                                                                                                                                                                                                                                                                                                                                                                                                                    |
| B.8.5.3    | Female infertility                                                     | N97**                                                                                                                                                                                                                                                                                                                                                                                                                                                                                    |
| B.8.5.4    | Endometriosis                                                          | N80                                                                                                                                                                                                                                                                                                                                                                                                                                                                                      |
| B.8.5.5    | Genital prolapse                                                       | N81                                                                                                                                                                                                                                                                                                                                                                                                                                                                                      |
| B.8.5.6    | Premenstrual syndrome                                                  | N94.3                                                                                                                                                                                                                                                                                                                                                                                                                                                                                    |
| B.8.5.7    | Other gynecological diseases                                           | N60**, N61-N64, N75-N76, N82-N83, N84**-N92 , N93- N94(Except N94.3), N98, N46**                                                                                                                                                                                                                                                                                                                                                                                                         |
| B.8.6      | Hemoglobinopathies and hemolytic anemias                               | D55-D59                                                                                                                                                                                                                                                                                                                                                                                                                                                                                  |
| B.8.6.1    | Thalassemias                                                           | D56                                                                                                                                                                                                                                                                                                                                                                                                                                                                                      |

|              |                                                           |                                                                                                                                                                                                                                                                                                                                                                                                                                                                                                                                                                                                                                                                                                                                                                    |
|--------------|-----------------------------------------------------------|--------------------------------------------------------------------------------------------------------------------------------------------------------------------------------------------------------------------------------------------------------------------------------------------------------------------------------------------------------------------------------------------------------------------------------------------------------------------------------------------------------------------------------------------------------------------------------------------------------------------------------------------------------------------------------------------------------------------------------------------------------------------|
| B.8.6.2      | Sickle cell disorders                                     | D57                                                                                                                                                                                                                                                                                                                                                                                                                                                                                                                                                                                                                                                                                                                                                                |
| B.8.6.3      | G6PD deficiency                                           | D55                                                                                                                                                                                                                                                                                                                                                                                                                                                                                                                                                                                                                                                                                                                                                                |
| B.8.6.4      | Other hemoglobinopathies and hemolytic anemias            | D58-D64.8                                                                                                                                                                                                                                                                                                                                                                                                                                                                                                                                                                                                                                                                                                                                                          |
| B.8.7        | Other endocrine, nutritional, blood, and immune disorders | D66-D89 (except D84.9, D86.0, D86.2, D86.9), E03-E07, E15-E34, E65-E67, E70-E85 (except E85.3, E85.4, E85.8, E85.9), E88 (except E88.9), E89-E96, D60-D64(except D64.9)                                                                                                                                                                                                                                                                                                                                                                                                                                                                                                                                                                                            |
| <b>B.9</b>   | <b>Musculoskeletal disorders</b>                          | <b>M05-M06, M15-M19**, M46.9, M47**, M48.0-M48.2**, M48.8**-M48.9**, M50-M54**, M10**, M00-M02, M08, M11**, M12-M13, M20-M25**, M30-M35,M40**, M41- M46 (except M46.9), M48** (except M48.0, M48.1, M48.2, M48.8, M48.9), M60**,M61-M62, M65-M71**, M72, M75- M79**, M80-M85, M87-M94 , M95-M99**</b>                                                                                                                                                                                                                                                                                                                                                                                                                                                              |
| B.9.1        | Rheumatoid arthritis                                      | M05-M06                                                                                                                                                                                                                                                                                                                                                                                                                                                                                                                                                                                                                                                                                                                                                            |
| B.9.2        | Osteoarthritis                                            | M15-M19**                                                                                                                                                                                                                                                                                                                                                                                                                                                                                                                                                                                                                                                                                                                                                          |
| B.9.3        | Low back and neck pain                                    | M46.9, M47** , M48.0-M48.2**, M48.8**-M48.9**, M50- M54**                                                                                                                                                                                                                                                                                                                                                                                                                                                                                                                                                                                                                                                                                                          |
| B.9.3.1      | Low back pain                                             | M46.9, M47** ,M48.0-M48.2** ,M48.8**-M48.9** , M51- M54**(except M53.1** ,M53.2**)                                                                                                                                                                                                                                                                                                                                                                                                                                                                                                                                                                                                                                                                                 |
| B.9.3.2      | Neck pain                                                 | M50**, M53.1** ,M53.2**                                                                                                                                                                                                                                                                                                                                                                                                                                                                                                                                                                                                                                                                                                                                            |
| B.9.4        | Gout                                                      | M10**                                                                                                                                                                                                                                                                                                                                                                                                                                                                                                                                                                                                                                                                                                                                                              |
| B.9.5        | Other musculoskeletal disorders                           | M00-M02, M08, M11** ,M12-M13, M20-M25**,M30- M35,M40** , M41-M46 (except M46.9), M48** (except M48.0, M48.1, M48.2, M48.8, M48.9), M60**, M61-M62, M65-M71** , M72, M75-M79** , M80-M85, M87-M94, M95- M99**                                                                                                                                                                                                                                                                                                                                                                                                                                                                                                                                                       |
| <b>B.10.</b> | <b>Other non-communicable diseases</b>                    | <b>B00,B07**- B09**, B35**, B36.0**, B36.1**, B36.2**, B36.3**, B36.8**, B36.9**, B66, B85**, B87**, B88**, H00-H21**, H25- H26**, H27*, H30-H35** (except H35.3), H35.3**, H40**, H43-H47**, H49-H52**, H53-H54**, H55- H61**, H68-H69**, H71-H83**, H90-H91**, H92-H93**, K02**, K05**, L00, L01, L02, L03.0, L03.1**, L03.2-L03.9, L04**, L05.0, L05.9, L08, L10-L13, L20**-L28**,L28**, L29**, L30**, L40**-L41**, L42**-L44**, L50**, L51, L52**-L53**, L55**- L60**, L63.0**, L63.1**, L63.8**, L63.9**, L64**-L68**, L70**, L71**-L75**, L80**-L85**, L87, L88, L89, L90**-L92**, L93, L94-L95, L97, L98.0-L98.4**, Q00, Q01-Q02, Q03, Q04, Q05, Q06-Q18, Q20-Q28, Q30-Q34, Q35-Q37, Q38-Q45, Q50- Q89 (except Q89.9), Q90, Q91-Q99 (except Q99.9), R95</b> |
| B.10.1       | Congenital anomalies                                      | Q00-Q99 (except Q89.9, Q99.9)                                                                                                                                                                                                                                                                                                                                                                                                                                                                                                                                                                                                                                                                                                                                      |
| B.10.1.1.    | Neural tube defects                                       | Q00, Q01, Q05                                                                                                                                                                                                                                                                                                                                                                                                                                                                                                                                                                                                                                                                                                                                                      |
| B.10.1.2.    | Congenital heart anomalies                                | Q20-Q28                                                                                                                                                                                                                                                                                                                                                                                                                                                                                                                                                                                                                                                                                                                                                            |
| B.10.1.3.    | Cleft lip and cleft palate                                | Q35-Q37                                                                                                                                                                                                                                                                                                                                                                                                                                                                                                                                                                                                                                                                                                                                                            |
| B.10.1.5.    | Down's syndrome                                           | Q90                                                                                                                                                                                                                                                                                                                                                                                                                                                                                                                                                                                                                                                                                                                                                                |
| B.10.1.6.    | Other chromosomal abnormalities                           | Q91-Q99 (except Q99.9)                                                                                                                                                                                                                                                                                                                                                                                                                                                                                                                                                                                                                                                                                                                                             |
| B.10.1.7.    | Other congenital anomalies                                | Q01-Q03, Q04, Q06-Q18, Q30-Q34, Q38-Q45, Q50-Q89 (except Q89.9)                                                                                                                                                                                                                                                                                                                                                                                                                                                                                                                                                                                                                                                                                                    |
| B.10.2       | Skin and subcutaneous diseases                            | B00,B07**-B09**,L70**, L63.0**, B35**, B36.0**, B36.1**, B36.2**, B36.3**, B36.8**, B36.9** , B66, B85**, B87**, B88**, L00, L01, L02, L03.0, L03.1**, L03.2-L03.9, L04**, L05.0, L05.9, L08, L10-L13, L20**-L28**, L28**, L29**, L30**, L40**-L41**, L42**-L44**, L50**-L89, L51, L52**-L53**, L55**-L60**, L63.1**, L63.8**, L63.9**, L64**-L68**, L71**-L75**, L80**-L85**, L87, L88, L90**-L92**, L93, L94-L95, L97, L98.0-L98.4**                                                                                                                                                                                                                                                                                                                             |
| B.10.2.1.    | Eczema                                                    | L20**-L28**                                                                                                                                                                                                                                                                                                                                                                                                                                                                                                                                                                                                                                                                                                                                                        |
| B.10.2.2.    | Psoriasis                                                 | L40**-L41**                                                                                                                                                                                                                                                                                                                                                                                                                                                                                                                                                                                                                                                                                                                                                        |
| B.10.2.3.    | Cellulitis                                                | L03.0, L03.1**, L03.2-L03.9                                                                                                                                                                                                                                                                                                                                                                                                                                                                                                                                                                                                                                                                                                                                        |
| B.10.2.4.    | Abscess, impetigo, and other bacterial skin diseases      | L00, L01, L02, L04**, L08, L88, L97, L98.0-L98.4**                                                                                                                                                                                                                                                                                                                                                                                                                                                                                                                                                                                                                                                                                                                 |
| B.10.2.5.    | Scabies                                                   | B66**                                                                                                                                                                                                                                                                                                                                                                                                                                                                                                                                                                                                                                                                                                                                                              |
| B.10.2.6.    | Fungal skin diseases                                      | B35**, B36.0**, B36.1**, B36.2**, B36.3**, B36.8**, B36.9**                                                                                                                                                                                                                                                                                                                                                                                                                                                                                                                                                                                                                                                                                                        |
| B.10.2.7.    | Viral skin diseases                                       | B00, B07**-B09**                                                                                                                                                                                                                                                                                                                                                                                                                                                                                                                                                                                                                                                                                                                                                   |
| B.10.2.8.    | Acne vulgaris                                             | L70**                                                                                                                                                                                                                                                                                                                                                                                                                                                                                                                                                                                                                                                                                                                                                              |
| B.10.2.9.    | Alopecia areata                                           | L63.0**, L63.1**, L63.8**, L63.9**, L29**                                                                                                                                                                                                                                                                                                                                                                                                                                                                                                                                                                                                                                                                                                                          |
| B.10.2.10    | Pruritus                                                  | L29**                                                                                                                                                                                                                                                                                                                                                                                                                                                                                                                                                                                                                                                                                                                                                              |
| B.10.2.11    | Urticaria                                                 | L50**                                                                                                                                                                                                                                                                                                                                                                                                                                                                                                                                                                                                                                                                                                                                                              |
| B.10.2.12    | Decubitus ulcer                                           | L89                                                                                                                                                                                                                                                                                                                                                                                                                                                                                                                                                                                                                                                                                                                                                                |
| B.10.2.13    | Other skin and subcutaneous diseases                      | B85**, B87**,B88**, L05.0, L05.9, L10-L13, L28**, L30**, L42**-L44**, L51, L52**-L53**, L55**-L60**, L64**-L68**, L71**-L75**, L80**-L85**, L87, L90**- L92**, L93, L94-L95                                                                                                                                                                                                                                                                                                                                                                                                                                                                                                                                                                                        |
| B.10.3       | Sense organ diseases                                      | H40**, H25-H26**, H35.3**,H49-H52**, H90-H91**, H30- H35** (except H35.3), H53-H54**, H00-H21**, H27*, H43- H47**, H55-H61**, H68-H69**, H71-H83**, H92-H93**                                                                                                                                                                                                                                                                                                                                                                                                                                                                                                                                                                                                      |
| B.10.3.1.    | Glaucoma                                                  | H40**                                                                                                                                                                                                                                                                                                                                                                                                                                                                                                                                                                                                                                                                                                                                                              |
| B.10.3.2.    | Cataracts                                                 | H25-H26**                                                                                                                                                                                                                                                                                                                                                                                                                                                                                                                                                                                                                                                                                                                                                          |
| B.10.3.3.    | Macular degeneration                                      | H35.3**                                                                                                                                                                                                                                                                                                                                                                                                                                                                                                                                                                                                                                                                                                                                                            |
| B.10.3.4.    | Refraction and accommodation disorders                    | H49-H52**                                                                                                                                                                                                                                                                                                                                                                                                                                                                                                                                                                                                                                                                                                                                                          |
| B.10.3.5.    | Other hearing loss                                        | H90-H91**                                                                                                                                                                                                                                                                                                                                                                                                                                                                                                                                                                                                                                                                                                                                                          |
| B.10.3.6.    | Other vision loss                                         | H30-H35** (except H35.3), H53-H54**                                                                                                                                                                                                                                                                                                                                                                                                                                                                                                                                                                                                                                                                                                                                |
| B.10.3.7.    | Other sense organ diseases                                | H00-H21**, H27*, H43-H47**, H55-H61**, H68-H69** , H71-H83**, H92-H93**                                                                                                                                                                                                                                                                                                                                                                                                                                                                                                                                                                                                                                                                                            |
| B.10.4       | Oral disorders                                            | K02** , K05**                                                                                                                                                                                                                                                                                                                                                                                                                                                                                                                                                                                                                                                                                                                                                      |
| B.10.4.1.    | Dental caries                                             | K02**                                                                                                                                                                                                                                                                                                                                                                                                                                                                                                                                                                                                                                                                                                                                                              |
| B.10.4.2.    | Periodontal disease                                       | K05**                                                                                                                                                                                                                                                                                                                                                                                                                                                                                                                                                                                                                                                                                                                                                              |
| B.10.4.3.    | Edentulism                                                | No ICD code**                                                                                                                                                                                                                                                                                                                                                                                                                                                                                                                                                                                                                                                                                                                                                      |
| B.10.5       | Sudden infant death syndrome                              | R95                                                                                                                                                                                                                                                                                                                                                                                                                                                                                                                                                                                                                                                                                                                                                                |
| <b>C</b>     | <b>Injuries</b>                                           | <b>V01-V04, V06, V09, V10-V19, V20-V29, V30-V79, V80, V81, V82 V05, V83-V86, V87.2-V87.3, V88.2, V88.3, V90, V91, V92, V93-V98W00-W19, W21, W24-W31, W39, W44, W45- W46, W49-W52, W53-W64, W65-W74, W75-W99, X00-X19, X20-X29, X30-X39, X40, X43-X44 W32-W34, X46-X47, X48, X50-X58, X60-X67, X68, X69, X70, X71, X72- X74, X75, X76-X77, X78-X83, X85-X92, X93-X95, X96-X98, X99, Y00-Y08, Y35, Y36, Y40-Y84, Y85.0, Y88, Y89.0, Y89.1</b>                                                                                                                                                                                                                                                                                                                        |
| <b>C.1</b>   | <b>Transport injuries</b>                                 | <b>V01-V04, V06,V09, V10-V19, V20-V29, Y85.0, V30-V79, V87.2-V87.3, V80, V82, V05,V81, V83-V86, V88.2, V88.3 , V91, V93-V98</b>                                                                                                                                                                                                                                                                                                                                                                                                                                                                                                                                                                                                                                    |
| C.1.1        | Road injury                                               | V01-V04, V06, V09, V10-V19, V20-V29, Y85.0, V30-V79, V87.2-V87.3, V80, V82                                                                                                                                                                                                                                                                                                                                                                                                                                                                                                                                                                                                                                                                                         |
| C.1.1.1      | Pedestrian injury by road vehicle                         | V01-V04, V06,V09                                                                                                                                                                                                                                                                                                                                                                                                                                                                                                                                                                                                                                                                                                                                                   |
| C.1.1.2      | Pedal cycle vehicle                                       | V10-V19                                                                                                                                                                                                                                                                                                                                                                                                                                                                                                                                                                                                                                                                                                                                                            |

|            |                                                             |                                                                                                                                                                    |
|------------|-------------------------------------------------------------|--------------------------------------------------------------------------------------------------------------------------------------------------------------------|
| C.1.1.3    | Motorized vehicle with two wheels                           | V20-V29                                                                                                                                                            |
| C.1.1.4    | Motorized vehicle with three or more wheels                 | V30-V79, V87.2-V87.3                                                                                                                                               |
| C.1.1.5    | Road injury other                                           | V80, V82                                                                                                                                                           |
| C.1.2      | Other transport injury                                      | V05,V81, V83-V86, V88.2, V88.3 , V91, V93-V98                                                                                                                      |
| <b>C.2</b> | <b>Unintentional injuries other than transport injuries</b> | <b>V90, V92, W00-W19, W21,W24-W31,W32-W34, W39, W44, W45-W46,W53-W64, W49-W52,W65-W74,W75-W99, X00-X19, X20-X29,X40, X43-X44,X46-X47, X48, X50-X58,Y40-Y84,Y88</b> |
| C.2.1      | Falls                                                       | W00-W19                                                                                                                                                            |
| C.2.2      | Drowning                                                    | V90, V92, W65-W74                                                                                                                                                  |
| C.2.3      | Fire, heat and hot substances                               | X00-X19                                                                                                                                                            |
| C.2.4      | Poisonings                                                  | X46-X47, X48, X40, X43-X44                                                                                                                                         |
| C.2.5      | Exposure to mechanical forces                               | W32-W34, W24-W31, W45-W46                                                                                                                                          |
| C.2.5.1    | Mechanical forces (firearm)                                 | W32-W34                                                                                                                                                            |
| C.2.5.2    | Mechanical forces (other)                                   | W24-W31, W45-W46                                                                                                                                                   |
| C.2.6      | Adverse effects of medical treatment                        | Y40-Y84, Y88                                                                                                                                                       |
| C.2.7      | Animal contact                                              | X20-X29, W53-W64                                                                                                                                                   |
| C.2.7.1    | Animal contact (venomous)                                   | X20-X29                                                                                                                                                            |
| C.2.7.2    | Animal contact (non-venomous)                               | W53-W64                                                                                                                                                            |
| C.2.8      | Unintentional injuries not classified elsewhere             | W21, W39, W44, W49-W52, W75-W99, X50-X58                                                                                                                           |
| <b>C.3</b> | <b>Self-harm and interpersonal violence</b>                 | <b>X60-X83, X85-X99, Y00-Y08</b>                                                                                                                                   |
| C.3.1      | Self-harm                                                   | X60-X83                                                                                                                                                            |
| C.3.2      | Interpersonal violence                                      | X93-X95, X99, X85-X92, X96-X98, Y00-Y08                                                                                                                            |
| C.3.2.1    | Assault by firearm                                          | X93-X95                                                                                                                                                            |
| C.3.2.2    | Assault by sharp object                                     | X99                                                                                                                                                                |
| C.3.2.3    | Assault by other means                                      | X85-X92, X96-X98, Y00-Y08                                                                                                                                          |
| <b>C.4</b> | <b>Forces of nature, war, and legal intervention</b>        | <b>X30-X39, Y36, Y89.1, Y35, Y89.0</b>                                                                                                                             |
| C.4.1      | Exposure to forces of nature                                | X30-X39                                                                                                                                                            |
| C.4.2      | Collective violence and legal intervention                  | Y36, Y89.1,Y35, Y89.0                                                                                                                                              |

**Notes:**

The format of this list is slightly different from the list originally published. We reorganized the order and introduced a new hierarchical code label to make easily use for comparison with other classification systems.

\* These codes have been used just for calculation of mortality (YLL)

\*\* These codes have been used just for calculation of non-fatal outcomes (YLD)

\*\*\* These codes are just usable for hospital data from the US

Reference: Christopher JL Murray et.al. GBD 2010: design, definitions, and metrics The Lancet - 15 December 2012 ( Vol. 380, Issue 9859, Pages 2063-2066 ) DOI: 10.1016/S0140-6736(12)61899-6

## WHO cause of death classification

| Code                                                                 | Verbal autopsy title                             | ICD-10 code (to ICD)                     | ICD-10 range                                     |
|----------------------------------------------------------------------|--------------------------------------------------|------------------------------------------|--------------------------------------------------|
| <b>Communicable diseases</b>                                         |                                                  |                                          |                                                  |
| <b>VAs-01 Infectious and parasitic diseases</b>                      |                                                  |                                          |                                                  |
| 1.01                                                                 | Sepsis                                           | A41                                      | A40-A41                                          |
| 1.02                                                                 | Acute respiratory infection, including pneumonia | J22/J18                                  | J00-J22                                          |
| 1.03                                                                 | HIV/AIDS related death                           | B24                                      | B20-B24                                          |
| 1.04                                                                 | Diarrheal diseases                               | A09                                      | A00-A09                                          |
| 1.05                                                                 | Malaria                                          | B54                                      | B50-B54                                          |
| 1.06                                                                 | Measles                                          | B05                                      | B05                                              |
| 1.07                                                                 | Meningitis and encephalitis                      | G03;G04                                  | A39; G00-G05                                     |
| 1.08                                                                 | Tetanus Excludes: Neonatal tetanus VAs-10.05     | A35 (obstetrical A34)                    | A33-A35                                          |
| 1.09                                                                 | Pulmonary tuberculosis                           | A16                                      | A15-A16                                          |
| 1.1                                                                  | Pertussis                                        | A37                                      | A37                                              |
| 1.11                                                                 | Haemorrhagic fever                               | A99                                      | A90-A99                                          |
| 1.99                                                                 | Other and unspecified infectious disease         | B99                                      | A17-A19;A20-A38;A42-A89; B00-B19;B25-B49;B55-B99 |
| <b>VAs-03 Nutritional and endocrine disorders</b>                    |                                                  |                                          |                                                  |
| 3.01                                                                 | Severe anaemia                                   | D64                                      | D50-D64                                          |
| 3.02                                                                 | Severe malnutrition                              | E46                                      | E40-E46                                          |
| 3.03                                                                 | Diabetes mellitus                                | E14                                      | E10-E14                                          |
| <b>VAs-09 Pregnancy, childbirth and puerperium-related disorders</b> |                                                  |                                          |                                                  |
| 9.01                                                                 | Ectopic pregnancy                                | O00                                      | O00                                              |
| 9.02                                                                 | Abortion-related death                           | O06                                      | O03-O08                                          |
| 9.03                                                                 | Pregnancy-induced hypertension                   | O13 (or O15 for eclampsia)               | O10-O16                                          |
| 9.04                                                                 | Obstetric haemorrhage                            | O46 (ante partum)<br>O72 (post partum)   | O46; O67; O72                                    |
| 9.05                                                                 | Obstructed labour                                | O66                                      | O63-O66                                          |
| 9.06                                                                 | Pregnancy-related sepsis                         | O75.3 (ante partum)<br>O85 (post partum) | O85; O75.3                                       |
| 9.07                                                                 | Anaemia of pregnancy                             | O99                                      | O99.0                                            |
| 9.08                                                                 | Ruptured uterus                                  | O71                                      | O71                                              |
| 9.99                                                                 | Other and unspecified maternal cause             | O05                                      | O01-O02;O20-O45;O47-O62;O68-O70;O73-O84;O86-O99  |
| <b>VAs-10 Neonatal causes of death</b>                               |                                                  |                                          |                                                  |
| 10.01                                                                | Prematurity                                      | P07                                      | P05-P07                                          |
| 10.02                                                                | Birth asphyxia                                   | P21                                      | P20-P22                                          |
| 10.03                                                                | Neonatal pneumonia                               | P23                                      | P23-P25                                          |
| 10.04                                                                | Neonatal sepsis                                  | P63                                      | P36                                              |
| 10.05                                                                | Neonatal tetanus                                 | A33                                      | A33                                              |
| 10.06                                                                | Congenital malformation                          | Q89                                      | Q00-Q99                                          |
| 10.99                                                                | Other and unspecified perinatal cause of death   | P96                                      | P00-P04; P08-P15; P26-P35; P37-P94; P96          |
| <b>VAs-11 Stillbirths</b>                                            |                                                  |                                          |                                                  |
| 11.01                                                                | Fresh stillbirth                                 | P95                                      | P95                                              |
| 11.02                                                                | Macerated stillbirth                             | P95                                      | P95                                              |
| <b>Non-communicable diseases (see Note 1)</b>                        |                                                  |                                          |                                                  |
| <b>VAs-02 Neoplasms</b>                                              |                                                  |                                          |                                                  |
| 2.01                                                                 | Oral neoplasms                                   | C06                                      | C00-C06                                          |
| 2.02                                                                 | Digestive neoplasms                              | C26                                      | C15-C26                                          |
| 2.03                                                                 | Respiratory neoplasms                            | C39                                      | C30-C39                                          |
| 2.04                                                                 | Breast neoplasms                                 | C50                                      | C50                                              |
| 2.05                                                                 | Female reproductive neoplasms                    | C57                                      | C51-C58                                          |
| 2.06                                                                 | Male reproductive neoplasms                      | C63                                      | C60-C63                                          |
| 2.99                                                                 | Other and unspecified neoplasms                  | C80                                      | C07-C14, C40-C49, C60-D48                        |
| <b>VAs-04 Diseases of the circulatory system</b>                     |                                                  |                                          |                                                  |
| 4.01                                                                 | Acute cardiac disease                            | I24 (acute ischemic)                     | I20-I25                                          |
| 4.02                                                                 | Stroke                                           | I64                                      | I60-I69                                          |
| 4.03                                                                 | Sickle cell with crisis                          | D57                                      | D57                                              |
| 4.99                                                                 | Other and unspecified cardiac disease            | I99                                      | I00-I09, I10-I15, I26-I52, I70-I99               |
| <b>VAs-05 Respiratory disorders</b>                                  |                                                  |                                          |                                                  |
| 5.01                                                                 | Chronic obstructive pulmonary disease (COPD)     | J44                                      | J40-J44                                          |
| 5.02                                                                 | Asthma                                           | J45 (J46)                                | J45-J46                                          |

|                                                     |                                                                     |     |                                                                                                                                                                            |
|-----------------------------------------------------|---------------------------------------------------------------------|-----|----------------------------------------------------------------------------------------------------------------------------------------------------------------------------|
| <b>VAs-06 Gastrointestinal disorders</b>            |                                                                     |     |                                                                                                                                                                            |
| 6.01                                                | Acute abdomen                                                       | R10 | R10                                                                                                                                                                        |
| 6.02                                                | Liver cirrhosis                                                     | K74 | K70-K76                                                                                                                                                                    |
| <b>VAs-07 Renal disorders</b>                       |                                                                     |     |                                                                                                                                                                            |
| 7.01                                                | Renal failure                                                       | N19 | N17-N19                                                                                                                                                                    |
| <b>VAs-08 Mental and nervous system disorders</b>   |                                                                     |     |                                                                                                                                                                            |
| 8.01                                                | Epilepsy                                                            | G40 | G40-G41                                                                                                                                                                    |
| 98                                                  | <b>Other and unspecified non-communicable disease.</b> (See Note 2) | R99 | D55-D89; E00-E07; E15-E35;E50-E90;F00-F99; G06-G09;G10-G37; G50-G99; H00-H95; J30-J39;J47-J99; K00-K31;K35-K38;K40-K93; L00-L99; M00-M99; N00-N16;N20-N99; R00-R09;R11-R94 |
| <b>VAs-12 External causes of death (See Note 3)</b> |                                                                     |     |                                                                                                                                                                            |
| 12.01                                               | Road traffic accident                                               | V89 | V01-V89                                                                                                                                                                    |
| 12.02                                               | Other transport accident                                            | V99 | V90-V99                                                                                                                                                                    |
| 12.03                                               | Accidental fall                                                     | W19 | W00-W19                                                                                                                                                                    |
| 12.04                                               | Accidental drowning and submersion                                  | W74 | W65-W74                                                                                                                                                                    |
| 12.05                                               | Accidental exposure to smoke, fire and flames                       | X09 | X00-X19                                                                                                                                                                    |
| 12.06                                               | Contact with venomous animals and plants                            | X29 | X20-X29                                                                                                                                                                    |
| 12.07                                               | Accidental poisoning and exposure to noxious substance              | X49 | X40-X49                                                                                                                                                                    |
| 12.08                                               | Intentional self-harm                                               | X84 | X60-X84                                                                                                                                                                    |
| 12.09                                               | Assault                                                             | Y09 | X85-Y09                                                                                                                                                                    |
| 12.1                                                | Exposure to force of nature                                         | X39 | X30-X39                                                                                                                                                                    |
| 12.99                                               | Other and unspecified external cause of death                       | X59 | S00-T99; W20-W64;W75-W99; X50-X59; Y10-Y98                                                                                                                                 |
| 99                                                  | <b>Cause of death unknown</b>                                       | R99 | R95-R99                                                                                                                                                                    |

#### Notes

- (1) This group covers all non-communicable conditions. Any infection of the systems that are listed in this section should be assigned to the suitable infectious disease category. Any maternal and perinatal condition should be assigned to the maternal and perinatal causes below.
- (2) This group covers all non-communicable conditions that could not be assigned to another category in this section. There is a separate category for cases where the cause of death is unknown.
- (4) The list of questions contains sub questions that allow for more specificity for accidents.
- (3) The format of this list is slightly different from the list originally published. We reorganized the order and introduced a new hierarchical code label to make easily use for comparison with other classification systems.

Source: WHO verbal autopsy instrument (2012) Appendix 1: 2012 cause of death list for verbal autopsy with corresponding ICD-10 codes pp A1-1 to A1-6
